# Supplementary material
Source: publisher site journal article supplement (https://www.spandidos-publications.com/3017/downloadSupplementary)
Supplement: Supplementary file 1 [file downloadSupplementary]

## Sheet: gene list of microarray.xlsx
Table SI. List of dysregulated genes of microarray analysis.
ProbeID	P-value (STX vs. NC)	FC (STX vs. NC)	log2FC (STX vs. NC)	Regulation (STX vs. NC)
A_19_P00315452	0.000328203	-1.90131	-0.926991	down
A_19_P00315492	0.178174	-1.39685	-0.482177	down
A_19_P00315493	0.0200934	-1.96519	-0.974668	down
A_19_P00315502	0.00682657	1.55547	0.637353	up
A_19_P00315506	0.0100509	-1.24604	-0.317353	down
A_19_P00315518	0.975618	1.00706	0.0101452	up
A_19_P00315519	0.0522677	-3.04881	-1.60825	down
A_19_P00315529	0.413297	1.12308	0.167461	up
A_19_P00315541	0.131825	-1.10547	-0.14466	down
A_19_P00315543	0.000204597	2.57308	1.3635	up
A_19_P00315551	0.0148705	-1.06931	-0.0966787	down
A_19_P00315581	0.73803	1.02283	0.032569	up
A_19_P00315584	0.00185533	-2.44267	-1.28846	down
A_19_P00315593	0.0195329	1.73049	0.791177	up
A_19_P00315603	0.0249529	-1.4456	-0.531665	down
A_19_P00315625	0.502334	1.19485	0.256832	up
A_19_P00315627	0.0661826	1.70725	0.771676	up
A_19_P00315631	0.00254891	-1.64549	-0.71852	down
A_19_P00315641	0.383362	1.24861	0.320323	up
A_19_P00315647	0.619917	1.22222	0.289501	up
A_19_P00315649	0.01425	-1.65973	-0.730952	down
A_19_P00315668	0.365734	-1.0752	-0.104603	down
A_19_P00315691	0.000589037	1.88647	0.915688	up
A_19_P00315705	4.46e-05	1.72424	0.785963	up
A_19_P00315716	0.312211	-1.0839	-0.116238	down
A_19_P00315725	0.862644	1.07778	0.108057	up
A_19_P00315753	0.0342307	-1.2237	-0.291247	down
A_19_P00315764	0.00215144	1.43018	0.5162	up
A_19_P00315773	0.0323172	-2.44029	-1.28705	down
A_19_P00315780	0.0222986	-1.29096	-0.368442	down
A_19_P00315804	0.307853	1.59721	0.675557	up
A_19_P00315810	0.957319	1.00587	0.00844132	up
A_19_P00315824	0.0217379	1.26867	0.343315	up
A_19_P00315841	0.248965	1.13859	0.187253	up
A_19_P00315843	0.0211142	-1.60092	-0.678897	down
A_19_P00315863	0.311866	1.87219	0.904723	up
A_19_P00315868	0.718207	-1.08925	-0.123332	down
A_19_P00315869	0.000107251	-2.24815	-1.16874	down
A_19_P00315905	0.149457	-2.17854	-1.12336	down
A_19_P00315922	0.00473232	1.29095	0.368431	up
A_19_P00315936	0.888492	1.01492	0.0213684	up
A_19_P00315941	0.364876	-1.20946	-0.274362	down
A_19_P00315959	0.473385	-1.08903	-0.123041	down
A_19_P00315967	0.00160158	1.62358	0.699183	up
A_19_P00316000	0.0283313	-1.36172	-0.445432	down
A_19_P00316007	0.413021	-1.14654	-0.197287	down
A_19_P00316013	0.0462584	1.94877	0.96256	up
A_19_P00316035	0.0178636	-4.31248	-2.10852	down
A_19_P00316050	0.00966238	-2.31465	-1.21079	down
A_19_P00316107	0.0048431	-1.97395	-0.981084	down
A_19_P00316110	0.0047094	-1.76426	-0.819061	down
A_19_P00316144	0.0492892	-1.87773	-0.908988	down
A_19_P00316156	0.863834	-1.02659	-0.037858	down
A_19_P00316164	0.427298	1.25403	0.326571	up
A_19_P00316185	0.00251963	1.46812	0.553974	up
A_19_P00316187	0.0320416	-1.12482	-0.169697	down
A_19_P00316202	0.0203741	1.21308	0.278674	up
A_19_P00316219	0.0113077	1.37071	0.454923	up
A_19_P00316225	0.242527	-1.07059	-0.0984035	down
A_19_P00316242	0.0484985	2.05366	1.0382	up
A_19_P00316257	0.42606	-1.28259	-0.359059	down
A_19_P00316324	0.309037	-1.60241	-0.680241	down
A_19_P00316326	0.146033	1.06205	0.0868522	up
A_19_P00316340	0.667425	1.09509	0.131053	up
A_19_P00316344	0.00118399	1.47998	0.565575	up
A_19_P00316349	0.00405317	-3.79299	-1.92333	down
A_19_P00316361	0.192861	1.23199	0.300996	up
A_19_P00316371	0.523821	1.33396	0.415715	up
A_19_P00316375	0.0116418	-1.40768	-0.493319	down
A_19_P00316396	0.00540672	3.08674	1.62608	up
A_19_P00316415	0.00602445	-1.74126	-0.800133	down
A_19_P00316423	0.00261986	1.10655	0.146074	up
A_19_P00316427	0.166646	-1.8935	-0.921057	down
A_19_P00316454	0.14486	-1.37404	-0.45842	down
A_19_P00316467	0.00555928	1.89181	0.919764	up
A_19_P00316493	0.0452699	1.54982	0.632103	up
A_19_P00316497	0.0667866	1.24285	0.313652	up
A_19_P00316528	4.81e-05	1.80936	0.855481	up
A_19_P00316533	0.00544357	1.49961	0.584586	up
A_19_P00316538	0.678407	1.28187	0.358249	up
A_19_P00316544	0.581169	-1.00165	-0.0023824	down
A_19_P00316547	0.537579	-1.0939	-0.129482	down
A_19_P00316557	0.392557	-2.41255	-1.27056	down
A_19_P00316564	0.000134246	3.12253	1.64272	up
A_19_P00316602	0.0179908	-1.03001	-0.042657	down
A_19_P00316622	0.945355	1.04623	0.0652052	up
A_19_P00316624	0.53359	1.06154	0.0861593	up
A_19_P00316625	0.046635	-2.34156	-1.22747	down
A_19_P00316657	0.171223	1.02309	0.0329372	up
A_19_P00316667	0.00848188	1.8937	0.92121	up
A_19_P00316675	0.542494	-1.15582	-0.208913	down
A_19_P00316682	0.0139834	1.67638	0.745353	up
A_19_P00316694	0.10702	1.34165	0.42401	up
A_19_P00316701	0.000378907	-1.49238	-0.577613	down
A_19_P00316705	0.00643314	-1.46571	-0.551599	down
A_19_P00316719	0.341971	-1.50011	-0.58507	down
A_19_P00316726	0.201296	1.05646	0.0792336	up
A_19_P00316753	0.498074	-1.01839	-0.0262966	down
A_19_P00316758	0.00146017	1.15354	0.206064	up
A_19_P00316778	0.000249988	2.94433	1.55794	up
A_19_P00316815	0.00551624	-1.32065	-0.401253	down
A_19_P00316820	0.275467	-1.21938	-0.286152	down
A_19_P00316836	0.0177095	1.46487	0.55077	up
A_19_P00316839	0.720489	1.19089	0.252035	up
A_19_P00316846	0.0514997	-1.01449	-0.0207577	down
A_19_P00316857	0.0332116	1.36381	0.447638	up
A_19_P00316871	0.227887	1.35593	0.43928	up
A_19_P00316914	0.00230862	3.69869	1.88701	up
A_19_P00316933	0.59744	-1.12992	-0.176223	down
A_19_P00316985	0.486047	1.41556	0.501373	up
A_19_P00317016	0.000239504	-1.44917	-0.535224	down
A_19_P00317023	0.0202474	-1.40748	-0.493112	down
A_19_P00317034	0.000672134	-3.07372	-1.61999	down
A_19_P00317042	0.122217	-1.36643	-0.450416	down
A_19_P00317046	0.43899	-1.10025	-0.137835	down
A_19_P00317053	0.00501045	1.69841	0.764187	up
A_19_P00317054	0.0310192	1.02373	0.0338341	up
A_19_P00317094	0.000217312	4.61025	2.20485	up
A_19_P00317144	0.0220715	2.2764	1.18675	up
A_19_P00317159	0.89195	-1.01448	-0.0207463	down
A_19_P00317168	0.298876	1.08464	0.117215	up
A_19_P00317171	0.75588	1.10158	0.139577	up
A_19_P00317178	0.00120687	-1.7355	-0.79535	down
A_19_P00317180	0.241356	-1.11954	-0.162907	down
A_19_P00317237	0.810614	-1.0346	-0.0490755	down
A_19_P00317277	0.339789	-1.3137	-0.393632	down
A_19_P00317287	0.670494	-1.22023	-0.287155	down
A_19_P00317314	0.0588439	1.14313	0.192994	up
A_19_P00317332	0.00527882	1.0471	0.0663961	up
A_19_P00317337	0.00341404	1.99675	0.997656	up
A_19_P00317360	0.0666056	1.29808	0.376376	up
A_19_P00317412	0.000454249	-1.53881	-0.621816	down
A_19_P00317444	0.00192957	-1.36251	-0.446265	down
A_19_P00317449	0.790611	-1.01173	-0.0168188	down
A_19_P00317451	0.747101	1.04427	0.0624961	up
A_19_P00317504	0.579766	-1.04447	-0.0627657	down
A_19_P00317507	0.0315191	-1.06373	-0.0891301	down
A_19_P00317519	0.00457515	-1.3129	-0.392759	down
A_19_P00317532	0.00970793	2.79004	1.48029	up
A_19_P00317563	0.00465469	3.93181	1.9752	up
A_19_P00317597	0.00235154	1.36793	0.451991	up
A_19_P00317612	0.348417	-1.25675	-0.329698	down
A_19_P00317616	0.0445697	2.53899	1.34425	up
A_19_P00317628	0.0239751	2.35583	1.23623	up
A_19_P00317631	0.341372	-1.7026	-0.767742	down
A_19_P00317647	0.00952632	1.11194	0.153078	up
A_19_P00317653	0.00182415	1.39592	0.48122	up
A_19_P00317671	0.304362	1.55768	0.639403	up
A_19_P00317748	0.0341705	-2.67871	-1.42154	down
A_19_P00317753	0.0685181	1.24813	0.319765	up
A_19_P00317759	0.00385754	3.49668	1.80599	up
A_19_P00317789	0.342326	-1.02956	-0.0420283	down
A_19_P00317818	0.0531631	1.91373	0.936389	up
A_19_P00317822	0.0293691	1.02548	0.0362973	up
A_19_P00317824	0.397455	1.051	0.0717663	up
A_19_P00317836	0.436521	1.16221	0.216874	up
A_19_P00317851	0.172557	-1.08831	-0.122091	down
A_19_P00317871	0.0445852	1.14297	0.192792	up
A_19_P00317872	0.00181051	1.40158	0.487052	up
A_19_P00317878	0.0298196	-2.29532	-1.19869	down
A_19_P00317885	0.174316	2.20578	1.14129	up
A_19_P00317904	0.201508	-1.2049	-0.268911	down
A_19_P00317913	0.023715	2.55441	1.35299	up
A_19_P00317937	0.0292286	1.37268	0.456993	up
A_19_P00317949	0.114107	1.77651	0.829047	up
A_19_P00317963	0.126768	1.6865	0.754031	up
A_19_P00317965	0.00339546	1.74516	0.803355	up
A_19_P00318013	0.791237	1.02082	0.0297317	up
A_19_P00318054	0.00205264	1.2779	0.353778	up
A_19_P00318059	0.000178137	5.19438	2.37695	up
A_19_P00318085	0.000447659	1.36452	0.448396	up
A_19_P00318091	0.632095	-1.02405	-0.0342847	down
A_19_P00318097	0.00347531	5.99112	2.58283	up
A_19_P00318107	0.667109	-1.06109	-0.0855464	down
A_19_P00318113	0.197249	1.32989	0.411304	up
A_19_P00318152	0.00516157	1.85051	0.887925	up
A_19_P00318154	0.0727699	2.10336	1.0727	up
A_19_P00318174	0.131362	1.09613	0.132414	up
A_19_P00318183	0.119861	2.63634	1.39854	up
A_19_P00318187	0.0249628	1.68018	0.748613	up
A_19_P00318189	0.0317106	-1.41774	-0.503588	down
A_19_P00318227	0.0355237	-1.71693	-0.779834	down
A_19_P00318243	0.00497383	1.32624	0.407341	up
A_19_P00318255	0.641775	-1.08023	-0.111341	down
A_19_P00318261	0.254077	-1.10192	-0.140025	down
A_19_P00318280	0.0286241	-1.67693	-0.745821	down
A_19_P00318284	0.000747532	1.55423	0.636197	up
A_19_P00318297	0.110849	-1.17621	-0.234141	down
A_19_P00318310	0.106703	-1.19032	-0.251347	down
A_19_P00318361	0.347841	-1.1438	-0.193837	down
A_19_P00318375	0.184928	1.95945	0.970447	up
A_19_P00318404	0.398424	-1.08688	-0.120187	down
A_19_P00318409	0.00421528	-1.75658	-0.81277	down
A_19_P00318413	0.857524	1.0216	0.0308261	up
A_19_P00318418	0.0308407	-1.29892	-0.377311	down
A_19_P00318443	0.191569	1.31954	0.400031	up
A_19_P00318444	0.166367	-1.42636	-0.512336	down
A_19_P00318461	0.000262695	1.93197	0.95007	up
A_19_P00318492	0.463369	1.08456	0.117105	up
A_19_P00318511	0.0121899	-2.7509	-1.4599	down
A_19_P00318514	0.0630488	2.38335	1.25299	up
A_19_P00318517	0.12504	-1.40058	-0.486027	down
A_19_P00318519	0.00715554	1.65696	0.728535	up
A_19_P00318537	0.367151	1.50116	0.586075	up
A_19_P00318544	0.0626794	-2.31368	-1.21019	down
A_19_P00318559	0.449251	1.08828	0.12205	up
A_19_P00318561	0.739787	-1.0356	-0.0504611	down
A_19_P00318587	0.0902214	1.21268	0.278199	up
A_19_P00318600	0.00692732	-2.61925	-1.38915	down
A_19_P00318609	0.207807	1.1984	0.261111	up
A_19_P00318638	0.642775	1.00704	0.0101178	up
A_19_P00318679	0.0165411	3.18845	1.67286	up
A_19_P00318725	0.0062683	2.54409	1.34715	up
A_19_P00318759	0.4417	-1.23546	-0.305054	down
A_19_P00318761	0.201727	1.13765	0.186058	up
A_19_P00318775	0.253696	1.94769	0.961766	up
A_19_P00318780	0.0112771	1.38708	0.472049	up
A_19_P00318790	0.0616226	3.13362	1.64783	up
A_19_P00318803	0.176974	1.1667	0.222437	up
A_19_P00318813	0.00180281	1.33325	0.414945	up
A_19_P00318815	0.00132395	1.30747	0.386777	up
A_19_P00318848	0.0270504	-1.62605	-0.701376	down
A_19_P00318878	0.00384232	-1.18556	-0.245566	down
A_19_P00318883	0.117256	-1.08545	-0.118292	down
A_19_P00318889	0.0282553	1.65331	0.725355	up
A_19_P00318894	0.102299	1.31887	0.399306	up
A_19_P00318904	0.308824	1.79868	0.846935	up
A_19_P00318909	0.434507	-1.06076	-0.0851016	down
A_19_P00318915	0.266094	1.0833	0.115433	up
A_19_P00318938	0.026518	1.02328	0.0331993	up
A_19_P00318954	0.00121096	2.89275	1.53244	up
A_19_P00319019	0.00193699	-1.463	-0.548928	down
A_19_P00319028	0.375456	-1.07935	-0.110169	down
A_19_P00319041	0.0338937	3.18133	1.66963	up
A_19_P00319044	0.440228	1.53785	0.620917	up
A_19_P00319057	0.00394137	2.54164	1.34576	up
A_19_P00319072	0.856743	1.03146	0.0446865	up
A_19_P00319080	0.204968	-1.35363	-0.436829	down
A_19_P00319093	0.00587345	-2.61232	-1.38533	down
A_19_P00319095	0.00123568	-1.46815	-0.553995	down
A_19_P00319099	0.195372	1.07743	0.107597	up
A_19_P00319140	0.0844285	1.29522	0.373194	up
A_19_P00319154	0.232931	-1.65378	-0.725767	down
A_19_P00319184	0.638903	-1.43168	-0.517713	down
A_19_P00319213	0.45249	-1.12739	-0.172992	down
A_19_P00319225	0.265927	-1.35432	-0.437568	down
A_19_P00319276	0.241851	1.65302	0.725106	up
A_19_P00319311	0.0537536	-3.10832	-1.63613	down
A_19_P00319337	0.000552101	1.55833	0.639997	up
A_19_P00319347	0.00251345	-3.21126	-1.68314	down
A_19_P00319372	0.000159829	1.43573	0.521784	up
A_19_P00319376	0.0422116	1.17582	0.233662	up
A_19_P00319398	0.498487	1.00374	0.00539113	up
A_19_P00319404	4.66e-06	6.131	2.61612	up
A_19_P00319409	0.499596	-1.11463	-0.156562	down
A_19_P00319413	0.0266024	-1.58268	-0.662365	down
A_19_P00319453	0.00253411	1.69973	0.765303	up
A_19_P00319465	0.0149729	1.26016	0.333609	up
A_19_P00319476	0.000128977	-1.79934	-0.847464	down
A_19_P00319509	0.442007	1.47473	0.560448	up
A_19_P00319525	0.226517	1.10527	0.144396	up
A_19_P00319528	0.00757321	-2.1454	-1.10125	down
A_19_P00319532	2.23e-05	-1.72753	-0.788714	down
A_19_P00319534	0.532254	-1.08998	-0.124302	down
A_19_P00319537	0.130776	1.30669	0.38592	up
A_19_P00319553	0.69792	-1.07992	-0.110922	down
A_19_P00319558	0.00654378	-6.37568	-2.67258	down
A_19_P00319561	0.0260304	-2.31439	-1.21063	down
A_19_P00319588	0.0763435	-3.41168	-1.77048	down
A_19_P00319625	5.87e-08	5.23597	2.38846	up
A_19_P00319633	0.22111	-1.12694	-0.172411	down
A_19_P00319640	0.0159133	1.18545	0.245439	up
A_19_P00319646	0.00205951	-1.37034	-0.454529	down
A_19_P00319655	0.144123	1.64756	0.720327	up
A_19_P00319682	0.0025356	-1.57677	-0.656972	down
A_19_P00319698	0.00391912	-3.06685	-1.61676	down
A_19_P00319709	0.135165	-1.62101	-0.696896	down
A_19_P00319712	0.428421	1.29078	0.368248	up
A_19_P00319721	0.0259398	1.34525	0.427874	up
A_19_P00319752	0.28686	1.14184	0.191362	up
A_19_P00319765	8.59e-05	5.15834	2.36691	up
A_19_P00319793	0.252083	-2.53721	-1.34324	down
A_19_P00319800	0.0108676	1.48502	0.570478	up
A_19_P00319825	0.000856708	2.55981	1.35604	up
A_19_P00319829	0.00478782	1.69199	0.758725	up
A_19_P00319854	0.0425374	1.53483	0.618076	up
A_19_P00319876	0.196654	1.62106	0.696936	up
A_19_P00319900	0.416488	-1.59715	-0.675499	down
A_19_P00319917	0.181529	-1.08569	-0.118611	down
A_19_P00319929	0.0598476	1.37085	0.455069	up
A_19_P00319963	0.00326068	2.05863	1.04169	up
A_19_P00319981	0.000299672	-1.35904	-0.442583	down
A_19_P00320028	0.0060433	-1.60627	-0.683718	down
A_19_P00320038	0.274681	-1.40399	-0.489537	down
A_19_P00320047	0.379822	1.20553	0.269667	up
A_19_P00320056	3.8e-05	1.5707	0.651407	up
A_19_P00320063	0.00781006	-1.86683	-0.900589	down
A_19_P00320066	0.0315189	-2.15272	-1.10616	down
A_19_P00320067	0.0150389	-1.64164	-0.715139	down
A_19_P00320088	0.0265142	1.36361	0.447429	up
A_19_P00320101	0.0497354	-1.41109	-0.496815	down
A_19_P00320108	0.00883118	1.29872	0.377089	up
A_19_P00320119	0.159603	-1.11879	-0.161943	down
A_19_P00320140	0.000695929	3.89808	1.96276	up
A_19_P00320144	0.000868996	3.65064	1.86815	up
A_19_P00320155	0.162065	1.74213	0.800851	up
A_19_P00320158	0.00406305	1.44127	0.527339	up
A_19_P00320162	0.962829	1.00801	0.011508	up
A_19_P00320193	0.819335	-1.00773	-0.0111111	down
A_19_P00320218	0.00478561	1.37811	0.462693	up
A_19_P00320229	0.868082	1.00872	0.0125267	up
A_19_P00320242	0.272263	1.16253	0.217274	up
A_19_P00320251	0.0614813	-2.57791	-1.3662	down
A_19_P00320274	0.00031235	2.20739	1.14234	up
A_19_P00320275	0.0221347	3.09444	1.62968	up
A_19_P00320314	0.0815062	1.09683	0.133344	up
A_19_P00320343	0.0222577	2.39244	1.25848	up
A_19_P00320351	0.00232926	1.21737	0.283773	up
A_19_P00320354	0.64204	-1.02258	-0.0322181	down
A_19_P00320362	0.00520987	2.15629	1.10855	up
A_19_P00320371	0.409159	-1.14169	-0.191175	down
A_19_P00320384	0.594346	1.02016	0.0288002	up
A_19_P00320434	0.0453242	1.19429	0.256151	up
A_19_P00320440	0.764008	-1.15392	-0.206548	down
A_19_P00320492	0.0829464	-1.8546	-0.891104	down
A_19_P00320498	0.404912	1.34973	0.432668	up
A_19_P00320536	0.037312	1.10448	0.143367	up
A_19_P00320543	0.125814	2.12682	1.0887	up
A_19_P00320555	0.048289	1.41187	0.497603	up
A_19_P00320562	0.399012	-1.10969	-0.150161	down
A_19_P00320570	0.126494	1.04936	0.069515	up
A_19_P00320579	0.000796714	-2.22794	-1.15571	down
A_19_P00320603	0.0293901	1.76126	0.816606	up
A_19_P00320611	0.25835	1.21997	0.286847	up
A_19_P00320614	0.843303	1.02823	0.0401625	up
A_19_P00320619	0.196144	1.59533	0.673852	up
A_19_P00320622	0.00535594	-1.6854	-0.753093	down
A_19_P00320663	0.690132	-1.10269	-0.141022	down
A_19_P00320664	0.121864	1.07321	0.101928	up
A_19_P00320716	0.897651	-1.02538	-0.0361655	down
A_19_P00320718	0.017176	2.29758	1.20011	up
A_19_P00320721	0.302274	-1.13978	-0.188754	down
A_19_P00320723	0.299892	-1.10659	-0.146123	down
A_19_P00320727	0.329644	1.11821	0.161187	up
A_19_P00320729	0.335192	1.27769	0.353542	up
A_19_P00320731	0.00112962	1.66208	0.732993	up
A_19_P00320740	0.102206	-2.35492	-1.23568	down
A_19_P00320746	0.011235	1.02858	0.0406522	up
A_19_P00320780	0.543071	-1.03922	-0.055498	down
A_19_P00320785	0.0643393	-2.68596	-1.42544	down
A_19_P00320792	0.0399255	1.24971	0.321593	up
A_19_P00320804	0.0453206	-3.1688	-1.66394	down
A_19_P00320814	0.942299	1.01472	0.0210854	up
A_19_P00320828	0.0535963	1.38097	0.465677	up
A_19_P00320846	0.163067	1.13595	0.183904	up
A_19_P00320872	0.000960672	4.53909	2.1824	up
A_19_P00320875	0.646728	-1.08254	-0.114422	down
A_19_P00320881	0.410452	1.10162	0.139633	up
A_19_P00320906	0.021164	4.09806	2.03494	up
A_19_P00320924	0.849815	1.02475	0.035276	up
A_19_P00320927	0.00457392	1.47113	0.556922	up
A_19_P00320948	0.0042057	1.37549	0.459946	up
A_19_P00320954	0.00316653	1.59107	0.670001	up
A_19_P00320966	0.851595	-1.01551	-0.0222089	down
A_19_P00320970	0.000338167	3.1259	1.64427	up
A_19_P00320971	0.031016	1.28006	0.356211	up
A_19_P00320972	0.406854	-1.13406	-0.1815	down
A_19_P00320989	0.0122116	-1.23729	-0.307188	down
A_19_P00320996	0.186159	-1.27752	-0.353342	down
A_19_P00321009	0.0668536	-1.048	-0.067641	down
A_19_P00321014	0.701931	1.02042	0.0291686	up
A_19_P00321039	0.334298	1.1348	0.182436	up
A_19_P00321061	0.51153	-1.48345	-0.568956	down
A_19_P00321063	0.0579615	1.2888	0.366024	up
A_19_P00321076	0.132524	-1.13937	-0.188238	down
A_19_P00321089	0.574009	-1.06904	-0.0963215	down
A_19_P00321098	0.564018	1.24838	0.320058	up
A_19_P00321110	0.251705	1.16954	0.225939	up
A_19_P00321124	0.0806617	6.76741	2.7586	up
A_19_P00321132	0.00460374	1.76165	0.81693	up
A_19_P00321143	0.24706	1.10122	0.139105	up
A_19_P00321147	0.00709304	2.43822	1.28583	up
A_19_P00321166	0.00571281	-1.51608	-0.600343	down
A_19_P00321178	0.387881	-1.47161	-0.557391	down
A_19_P00321183	0.607641	-1.0399	-0.0564454	down
A_19_P00321187	0.248754	-1.53049	-0.61399	down
A_19_P00321190	0.350296	-1.1972	-0.259663	down
A_19_P00321194	0.149181	1.47983	0.565428	up
A_19_P00321202	0.0023356	1.67416	0.743437	up
A_19_P00321210	0.877516	1.002	0.00287787	up
A_19_P00321223	0.00438161	2.41753	1.27353	up
A_19_P00321230	0.178298	-1.10092	-0.138713	down
A_19_P00321259	0.0267146	-1.08856	-0.122423	down
A_19_P00321279	0.989498	-1.00182	-0.00262016	down
A_19_P00321284	0.00242896	-1.26663	-0.340991	down
A_19_P00321310	0.0101563	1.38934	0.474397	up
A_19_P00321319	0.15507	-1.76487	-0.819559	down
A_19_P00321332	0.00288651	-1.46299	-0.548917	down
A_19_P00321342	0.00154106	1.43628	0.522337	up
A_19_P00321356	0.0404553	1.54404	0.626712	up
A_19_P00321360	0.125415	1.10626	0.145685	up
A_19_P00321361	0.0175122	1.15982	0.2139	up
A_19_P00321383	0.00471134	-1.80069	-0.848551	down
A_19_P00321388	0.00957945	1.29527	0.37325	up
A_19_P00321390	0.357109	1.10776	0.147645	up
A_19_P00321398	0.181998	1.27476	0.350224	up
A_19_P00321403	0.99243	1.00508	0.00731396	up
A_19_P00321414	0.0161911	3.85644	1.94727	up
A_19_P00321461	0.740959	1.03058	0.0434501	up
A_19_P00321473	0.000348231	1.26267	0.336482	up
A_19_P00321475	0.300191	-1.09817	-0.135104	down
A_19_P00321478	0.0140585	2.63413	1.39733	up
A_19_P00321493	0.00137399	1.55091	0.633115	up
A_19_P00321511	0.000368045	-1.65997	-0.731156	down
A_19_P00321540	0.146695	1.25241	0.324705	up
A_19_P00321556	2.68e-05	-1.08238	-0.114211	down
A_19_P00321562	0.628447	-1.0206	-0.0294152	down
A_19_P00321568	9.8e-05	1.80286	0.850285	up
A_19_P00321571	0.0262971	2.55839	1.35523	up
A_19_P00321575	0.434626	1.35758	0.441033	up
A_19_P00321577	0.0087095	1.33878	0.420924	up
A_19_P00321588	0.167913	1.47531	0.561022	up
A_19_P00321597	0.00261441	-3.78852	-1.92164	down
A_19_P00321598	0.410975	-1.08868	-0.122586	down
A_19_P00321631	0.0183379	2.06109	1.04341	up
A_19_P00321636	0.188489	-1.23557	-0.30518	down
A_19_P00321648	0.017171	2.85556	1.51378	up
A_19_P00321656	0.317761	-1.44874	-0.534798	down
A_19_P00321670	0.711405	-1.01704	-0.0243788	down
A_19_P00321671	0.00464172	1.5104	0.594931	up
A_19_P00321692	0.0936379	1.60505	0.682617	up
A_19_P00321697	0.0260623	1.22495	0.292719	up
A_19_P00321715	0.0155435	4.15612	2.05524	up
A_19_P00321721	0.0151559	-2.40448	-1.26573	down
A_19_P00321722	0.0381712	1.23086	0.299669	up
A_19_P00321734	0.000140902	1.61002	0.687081	up
A_19_P00321739	0.114041	-1.38596	-0.470887	down
A_19_P00321743	0.0102772	-1.77345	-0.826559	down
A_19_P00321765	0.263612	1.14933	0.200797	up
A_19_P00321781	0.000711479	1.4689	0.554736	up
A_19_P00321782	0.0379356	-1.09768	-0.134458	down
A_19_P00321789	2.34e-05	3.44128	1.78295	up
A_19_P00321831	0.546067	1.03453	0.0489815	up
A_19_P00321839	0.278606	1.47465	0.560369	up
A_19_P00321849	0.129022	-2.02122	-1.01523	down
A_19_P00321858	0.00793331	1.28168	0.358031	up
A_19_P00321872	0.195513	1.17652	0.234526	up
A_19_P00321890	0.0174827	-1.41221	-0.497954	down
A_19_P00321911	0.322663	-1.74248	-0.801145	down
A_19_P00321953	0.00635815	-2.83961	-1.50569	down
A_19_P00321977	0.00862408	-1.32215	-0.40289	down
A_19_P00321986	0.399807	-1.16524	-0.220627	down
A_19_P00321998	0.568739	1.16947	0.225857	up
A_19_P00322017	0.0545139	1.87163	0.904294	up
A_19_P00322023	0.0169316	1.91342	0.936155	up
A_19_P00322058	0.07098	2.07392	1.05236	up
A_19_P00322088	0.021578	-1.76866	-0.822656	down
A_19_P00322096	0.0269565	-1.25304	-0.325429	down
A_19_P00322109	0.191399	-1.17791	-0.236226	down
A_19_P00322121	0.0219278	-1.26479	-0.338899	down
A_19_P00322164	0.36929	-5.004	-2.32308	down
A_19_P00322166	0.00708468	-3.66304	-1.87304	down
A_19_P00322173	0.360206	-1.21204	-0.277434	down
A_19_P00322182	0.738356	1.16032	0.214518	up
A_19_P00322183	0.261422	-1.39297	-0.478168	down
A_19_P00322188	0.366063	1.34938	0.432296	up
A_19_P00322191	0.245635	1.14913	0.200538	up
A_19_P00322219	0.111446	-1.48978	-0.575098	down
A_19_P00322220	0.00645125	-1.15394	-0.206564	down
A_19_P00322228	0.360217	-1.0561	-0.0787497	down
A_19_P00322236	0.0468227	-2.25598	-1.17375	down
A_19_P00322259	0.196196	1.89976	0.925814	up
A_19_P00322260	0.178914	-1.1645	-0.219715	down
A_19_P00322262	0.045396	1.01922	0.0274593	up
A_19_P00322276	0.00921723	1.33294	0.414608	up
A_19_P00322291	0.010615	1.03946	0.0558315	up
A_19_P00322299	0.274503	1.07413	0.103175	up
A_19_P00322310	0.6119	1.39737	0.482714	up
A_19_P00322316	0.702315	-1.20289	-0.266504	down
A_19_P00322321	0.364779	1.10076	0.138496	up
A_19_P00322330	0.043333	1.26982	0.344627	up
A_19_P00322333	0.0095964	-2.00054	-1.00039	down
A_19_P00322339	0.409137	-1.51116	-0.595654	down
A_19_P00322349	0.192673	1.45837	0.54436	up
A_19_P00322354	0.00921496	1.02488	0.0354522	up
A_19_P00322357	0.0339728	1.25225	0.324521	up
A_19_P00322384	0.914036	1.01488	0.0213033	up
A_19_P00322397	0.0136259	2.68075	1.42264	up
A_19_P00322407	0.533219	1.09767	0.134445	up
A_19_P00322418	0.618576	1.13625	0.184281	up
A_19_P00322420	0.209653	1.29187	0.369457	up
A_19_P00322440	0.804663	1.15215	0.204335	up
A_19_P00322454	0.188305	-1.56947	-0.650274	down
A_19_P00322479	0.0834568	-1.7331	-0.793358	down
A_19_P00322495	0.251493	-1.14083	-0.190082	down
A_19_P00322498	0.145261	1.12488	0.169774	up
A_19_P00322523	0.158822	-1.31688	-0.397122	down
A_19_P00322526	0.449199	-1.22268	-0.290048	down
A_19_P00322533	0.611254	-1.02151	-0.0307069	down
A_19_P00322569	0.506969	-1.03577	-0.050702	down
A_19_P00322571	0.0051246	-1.98607	-0.989915	down
A_19_P00322573	0.801788	-1.03253	-0.0461811	down
A_19_P00322583	0.232427	1.06972	0.0972372	up
A_19_P00322599	0.461679	-1.06427	-0.0898705	down
A_19_P00322605	0.00138022	-1.02373	-0.0338308	down
A_19_P00322611	0.101787	2.52751	1.33772	up
A_19_P00322624	0.0177804	1.80428	0.851425	up
A_19_P00322629	0.0789975	-1.00828	-0.0118958	down
A_19_P00322645	0.0829048	-1.44732	-0.533383	down
A_19_P00322662	0.177923	2.09322	1.06573	up
A_19_P00322663	0.0135339	1.59631	0.674743	up
A_19_P00322673	0.865883	-1.02774	-0.0394709	down
A_19_P00322687	0.473208	1.02133	0.0304454	up
A_19_P00322711	0.2034	2.14848	1.10331	up
A_19_P00322733	0.623676	1.10089	0.138667	up
A_19_P00322737	0.500239	-1.0697	-0.0972017	down
A_19_P00322743	0.00428747	-2.15534	-1.10792	down
A_19_P00322746	0.278473	-1.79658	-0.845253	down
A_19_P00322757	0.0403113	1.46191	0.547852	up
A_19_P00322762	0.0110637	1.24112	0.311644	up
A_19_P00322797	0.216064	1.14589	0.196468	up
A_19_P00322809	0.890427	1.0573	0.0803837	up
A_19_P00322815	0.555651	-1.10084	-0.138603	down
A_19_P00322828	0.0502323	1.20714	0.271588	up
A_19_P00322835	0.50672	-1.05256	-0.073901	down
A_19_P00322837	0.878578	-1.04127	-0.058342	down
A_19_P00322850	0.730847	-1.17606	-0.233961	down
A_19_P00322859	0.000155918	-4.07998	-2.02856	down
A_19_P00322886	0.223892	1.8005	0.848398	up
A_19_P00322890	0.134015	-1.95065	-0.963951	down
A_19_P00322898	0.220442	1.08823	0.12198	up
A_19_P00322906	0.599207	1.05128	0.0721424	up
A_19_P00322911	0.566943	1.12721	0.172759	up
A_19_P00322925	0.905065	1.03162	0.0449169	up
A_19_P00322929	0.023086	1.20834	0.273021	up
A_19_P00322932	0.00123895	1.54845	0.630825	up
A_19_P00322934	0.00228172	1.37298	0.457307	up
A_19_P00322936	0.00622421	2.98486	1.57766	up
A_19_P00322938	0.577321	-1.05102	-0.0717879	down
A_19_P00322939	0.125011	-1.07403	-0.103038	down
A_19_P00322941	2.97e-06	6.75084	2.75507	up
A_19_P00322944	0.00068776	-1.67041	-0.740202	down
A_19_P00322946	0.296648	1.68415	0.752023	up
A_19_P00322948	0.00100939	-1.61293	-0.689681	down
A_19_P00322953	0.162613	1.17267	0.229799	up
A_19_P00322962	0.54831	1.43068	0.516702	up
A_19_P00322966	0.0964676	-1.31411	-0.394087	down
A_19_P00322968	0.475045	-1.07634	-0.106132	down
A_19_P00322977	0.957042	1.00699	0.0100503	up
A_19_P00322997	0.18493	-1.92767	-0.946856	down
A_19_P00323005	0.707644	-1.16935	-0.225711	down
A_19_P00323025	7.45e-05	4.62174	2.20844	up
A_19_P00323082	0.000132481	-16.3323	-4.02965	down
A_19_P00323103	0.0347924	1.87502	0.906906	up
A_19_P00323413	0.0766766	-1.28236	-0.358802	down
A_19_P00323609	0.00253467	1.57949	0.659462	up
A_19_P00323692	0.00068086	-1.65103	-0.72337	down
A_19_P00324359	0.161831	-1.25182	-0.324028	down
A_19_P00324399	0.198178	-1.09865	-0.135728	down
A_19_P00324470	0.968441	-1.0072	-0.0103477	down
A_19_P00324550	0.741183	-1.12462	-0.16944	down
A_19_P00324582	0.0537201	-1.23798	-0.307993	down
A_19_P00324814	0.00319528	-1.5431	-0.625827	down
A_19_P00325158	0.0520806	-1.15554	-0.208563	down
A_19_P00325336	0.000674792	-1.65506	-0.726885	down
A_19_P00325498	0.87028	-1.00397	-0.00571051	down
A_19_P00325604	0.000279428	4.76401	2.25218	up
A_19_P00325768	0.0435247	1.04853	0.0683732	up
A_19_P00325810	0.0542668	1.12363	0.16817	up
A_19_P00325887	0.329433	1.1602	0.214371	up
A_19_P00326248	0.0027983	-1.28892	-0.366167	down
A_19_P00326514	0.693808	1.03141	0.044611	up
A_19_P00326532	0.893584	1.00682	0.00980542	up
A_19_P00326558	0.0007314	3.06466	1.61573	up
A_19_P00326732	0.491369	-1.00672	-0.00966902	down
A_19_P00326808	0.092335	1.27609	0.351725	up
A_19_P00327035	0.720282	-1.02613	-0.0372151	down
A_19_P00327081	0.78567	-1.03304	-0.046895	down
A_19_P00327320	0.496953	-1.08963	-0.123834	down
A_19_P00327354	0.468508	1.05736	0.0804644	up
A_19_P00327406	0.109348	1.54395	0.626629	up
A_19_P00327415	0.0273555	1.34877	0.431649	up
A_19_P00328832	0.301417	1.53706	0.620169	up
A_19_P00328886	0.00271707	-1.373	-0.457334	down
A_19_P00329564	0.00218033	-1.1955	-0.257617	down
A_19_P00330048	0.57995	1.1523	0.204512	up
A_19_P00330076	2.71e-05	-1.69241	-0.759082	down
A_19_P00330308	0.0642372	-1.54964	-0.631931	down
A_19_P00330549	0.0390875	1.41242	0.498167	up
A_19_P00330814	0.153419	-1.46434	-0.550248	down
A_19_P00331839	0.197612	1.37904	0.463661	up
A_19_P00331853	0.180105	-1.11906	-0.162292	down
A_19_P00800061	0.00873263	-1.28576	-0.362616	down
A_19_P00800114	0.392085	1.02429	0.0346284	up
A_19_P00800166	0.149943	1.00978	0.0140368	up
A_19_P00800206	0.00529343	1.96204	0.972358	up
A_19_P00800229	0.522117	1.05932	0.0831371	up
A_19_P00800244	0.000132184	1.87144	0.904145	up
A_19_P00800264	0.0025177	1.53941	0.622376	up
A_19_P00800283	0.0702415	1.21845	0.285042	up
A_19_P00800467	0.477175	1.02214	0.0315921	up
A_19_P00800522	0.294562	1.00514	0.0074031	up
A_19_P00800549	0.000962672	1.23298	0.302145	up
A_19_P00800555	0.0657653	1.57334	0.653827	up
A_19_P00800629	0.421471	-1.38733	-0.472313	down
A_19_P00800638	0.00111778	1.73799	0.797416	up
A_19_P00800667	0.000994619	2.88965	1.53089	up
A_19_P00800927	0.0202608	-2.68034	-1.42242	down
A_19_P00801041	0.0709042	-1.35064	-0.433646	down
A_19_P00801042	0.0175657	1.30366	0.382567	up
A_19_P00801088	0.220081	-1.09535	-0.131392	down
A_19_P00801279	0.0226977	1.9603	0.971076	up
A_19_P00801324	0.0584293	-1.25326	-0.325686	down
A_19_P00801407	0.00383937	2.80542	1.48822	up
A_19_P00801416	0.270136	-1.41186	-0.497596	down
A_19_P00801490	0.0316899	1.05338	0.0750293	up
A_19_P00801506	0.0693722	1.22122	0.288327	up
A_19_P00801627	0.463824	1.19924	0.262124	up
A_19_P00801735	0.000247629	1.54255	0.625317	up
A_19_P00801752	0.829585	-1.01461	-0.0209269	down
A_19_P00801821	0.0162602	-1.11145	-0.152443	down
A_19_P00801823	0.000700637	2.59622	1.37641	up
A_19_P00801867	0.464707	1.06983	0.0973777	up
A_19_P00801917	0.132574	-1.1439	-0.193956	down
A_19_P00801945	0.0191149	1.24777	0.319352	up
A_19_P00802027	0.150321	-1.04203	-0.0593919	down
A_19_P00802137	0.297201	1.24466	0.315757	up
A_19_P00802141	0.176789	-1.05415	-0.0760845	down
A_19_P00802154	0.206016	-1.64486	-0.717964	down
A_19_P00802168	0.0111075	1.95068	0.963978	up
A_19_P00802201	0.005732	-2.54723	-1.34893	down
A_19_P00802238	0.0140946	1.69708	0.763056	up
A_19_P00802297	0.512595	-1.29573	-0.373769	down
A_19_P00802413	0.855138	-1.00691	-0.00993051	down
A_19_P00802417	0.0123801	-1.33	-0.41143	down
A_19_P00802420	0.208192	-1.40724	-0.492864	down
A_19_P00802433	0.00152831	2.17557	1.12139	up
A_19_P00802448	0.389887	1.28989	0.367247	up
A_19_P00802464	2.31e-05	2.45341	1.29479	up
A_19_P00802546	0.0842478	-1.13606	-0.184042	down
A_19_P00802550	0.272549	-1.11918	-0.162438	down
A_19_P00802587	0.681155	-1.08115	-0.112566	down
A_19_P00802607	0.00274572	1.0263	0.0374579	up
A_19_P00802614	0.194328	1.16027	0.21446	up
A_19_P00802713	0.480256	-1.13129	-0.177967	down
A_19_P00802814	0.16505	-2.10009	-1.07045	down
A_19_P00802936	0.00184539	1.11035	0.151012	up
A_19_P00802954	0.149664	1.18801	0.248546	up
A_19_P00803019	0.0624599	1.02182	0.0311424	up
A_19_P00803039	0.00950582	2.15216	1.10579	up
A_19_P00803086	0.623472	-1.03436	-0.0487434	down
A_19_P00803093	0.240735	-1.81238	-0.857884	down
A_19_P00803124	0.0935624	-3.15791	-1.65897	down
A_19_P00803201	0.104135	1.73891	0.79818	up
A_19_P00803225	0.00415781	2.9224	1.54715	up
A_19_P00803226	0.562985	1.05709	0.0800983	up
A_19_P00803334	0.0291886	2.94922	1.56033	up
A_19_P00803360	0.197386	1.05717	0.0802018	up
A_19_P00803441	7.24e-05	3.97043	1.98929	up
A_19_P00803472	0.0292588	-1.2898	-0.367142	down
A_19_P00803499	0.0335671	1.02456	0.0350115	up
A_19_P00803507	0.000101782	-1.79886	-0.84708	down
A_19_P00803675	0.245251	1.45895	0.544927	up
A_19_P00803685	0.018763	-1.92204	-0.942639	down
A_19_P00803697	0.0223085	2.16021	1.11117	up
A_19_P00803775	0.00662499	1.26652	0.340871	up
A_19_P00803850	0.00904403	1.39497	0.480239	up
A_19_P00803864	0.216158	1.73023	0.79096	up
A_19_P00803960	0.000278151	-1.37119	-0.455427	down
A_19_P00803997	0.389192	-1.06981	-0.0973516	down
A_19_P00804020	0.0237347	-1.19299	-0.254581	down
A_19_P00804049	0.101887	-1.20242	-0.265941	down
A_19_P00804070	0.0743055	-1.95762	-0.9691	down
A_19_P00804072	0.121315	-1.19198	-0.253355	down
A_19_P00804093	0.679564	-1.23812	-0.308147	down
A_19_P00804120	0.0633227	1.86689	0.900634	up
A_19_P00804212	0.0160678	-1.11571	-0.157962	down
A_19_P00804359	0.820637	1.03609	0.0511553	up
A_19_P00804417	0.0295762	1.27156	0.3466	up
A_19_P00804489	0.00938242	2.47593	1.30797	up
A_19_P00804723	0.124655	1.49577	0.580885	up
A_19_P00804740	0.0184275	1.53334	0.616677	up
A_19_P00804777	0.0466594	1.66149	0.732478	up
A_19_P00804859	0.0303808	1.49669	0.581774	up
A_19_P00804922	0.00394277	-1.45497	-0.540992	down
A_19_P00804924	0.531102	1.22774	0.296002	up
A_19_P00804950	0.00457493	1.29268	0.370369	up
A_19_P00804979	0.00790317	2.2051	1.14085	up
A_19_P00805076	0.000873871	1.80443	0.851545	up
A_19_P00805218	0.137857	-2.02168	-1.01555	down
A_19_P00805263	0.371407	-1.21451	-0.280375	down
A_19_P00805273	0.0627534	-1.14958	-0.201112	down
A_19_P00805291	0.559269	1.02001	0.0285867	up
A_19_P00805339	0.20073	-2.2583	-1.17524	down
A_19_P00805433	0.000448753	2.85836	1.51519	up
A_19_P00805452	0.00144821	-1.3148	-0.394843	down
A_19_P00805523	0.0135215	2.2831	1.191	up
A_19_P00805548	0.00734196	-1.19193	-0.253297	down
A_19_P00805593	0.0181665	2.24169	1.16459	up
A_19_P00805651	0.00157347	-1.40813	-0.493778	down
A_19_P00805679	0.00019229	1.61297	0.689716	up
A_19_P00805748	0.0305662	2.54164	1.34576	up
A_19_P00805812	0.501813	-1.17161	-0.228492	down
A_19_P00805840	0.000142414	-1.58427	-0.663815	down
A_19_P00805950	0.0408949	1.50047	0.58541	up
A_19_P00805954	0.0130064	-1.28452	-0.361228	down
A_19_P00806071	7.82e-05	3.24613	1.69872	up
A_19_P00806158	2.87e-05	-1.4482	-0.534264	down
A_19_P00806193	0.0114816	2.64114	1.40116	up
A_19_P00806320	0.00706496	-1.17456	-0.232124	down
A_19_P00806441	0.808873	1.07491	0.104222	up
A_19_P00806450	0.349494	1.07784	0.108142	up
A_19_P00806473	0.00105031	5.02653	2.32956	up
A_19_P00806486	0.392142	1.52701	0.610705	up
A_19_P00806499	0.0235572	1.76404	0.818882	up
A_19_P00806593	0.331917	1.67692	0.74581	up
A_19_P00806702	0.237364	-1.59027	-0.669273	down
A_19_P00806707	0.318752	1.5143	0.598649	up
A_19_P00806882	0.0055696	1.24401	0.314996	up
A_19_P00806883	0.0411778	2.2502	1.17005	up
A_19_P00806911	0.0300158	1.32513	0.406136	up
A_19_P00806930	0.422342	1.07828	0.10873	up
A_19_P00807046	0.213721	1.0838	0.116093	up
A_19_P00807053	0.000659282	1.52883	0.612432	up
A_19_P00807328	0.172683	-1.22799	-0.296297	down
A_19_P00807336	0.00157951	-1.26068	-0.334204	down
A_19_P00807384	6.48e-05	-3.52993	-1.81964	down
A_19_P00807411	0.0056774	1.01942	0.0277541	up
A_19_P00807468	0.00320007	1.92688	0.946265	up
A_19_P00807507	0.0425026	1.13053	0.177006	up
A_19_P00807545	0.0788833	-1.48004	-0.565641	down
A_19_P00807614	0.281887	1.23226	0.301302	up
A_19_P00807643	0.000458772	2.74214	1.4553	up
A_19_P00807670	0.0508697	1.23072	0.299506	up
A_19_P00807748	0.854062	1.01098	0.0157596	up
A_19_P00807752	0.00292282	-1.71818	-0.780878	down
A_19_P00807783	0.143051	-1.6818	-0.750009	down
A_19_P00807869	0.051031	1.11041	0.15109	up
A_19_P00808033	0.00921112	-1.6345	-0.708848	down
A_19_P00808044	0.46524	-3.68996	-1.8836	down
A_19_P00808072	0.0947342	-1.15174	-0.203814	down
A_19_P00808088	0.257914	1.51481	0.599136	up
A_19_P00808120	0.0402588	1.28722	0.36426	up
A_19_P00808208	0.00287186	-1.16083	-0.215163	down
A_19_P00808285	0.0680878	1.59464	0.673229	up
A_19_P00808320	0.00150582	-1.67868	-0.747331	down
A_19_P00808348	0.71831	1.06763	0.0944159	up
A_19_P00808382	0.2446	-1.11394	-0.155666	down
A_19_P00808384	0.188492	-1.59754	-0.675852	down
A_19_P00808453	0.339213	-1.02265	-0.0323183	down
A_19_P00808461	0.00435579	-1.11847	-0.161526	down
A_19_P00808586	0.00651552	-1.03159	-0.044867	down
A_19_P00808588	0.463759	-1.3199	-0.400425	down
A_19_P00808668	0.00197724	-1.23653	-0.306296	down
A_19_P00808726	0.519852	-1.09582	-0.132012	down
A_19_P00808758	0.0872554	1.06716	0.0937824	up
A_19_P00808774	0.0247943	-1.38776	-0.472756	down
A_19_P00808794	0.645908	-1.16316	-0.218047	down
A_19_P00808834	0.0116882	1.54147	0.624307	up
A_19_P00808846	0.169038	1.01371	0.0196432	up
A_19_P00808883	0.600752	1.1029	0.141303	up
A_19_P00808923	0.008953	1.25576	0.328564	up
A_19_P00809029	0.0577923	-1.22544	-0.2933	down
A_19_P00809030	0.703249	-1.28075	-0.356985	down
A_19_P00809076	0.00179842	1.7081	0.772392	up
A_19_P00809119	0.0116188	1.92308	0.943422	up
A_19_P00809139	0.0603884	-1.19325	-0.254895	down
A_19_P00809168	0.208278	-1.70604	-0.770648	down
A_19_P00809335	0.0602996	1.83197	0.873399	up
A_19_P00809368	0.00104248	4.95162	2.3079	up
A_19_P00809372	0.116515	-2.1235	-1.08644	down
A_19_P00809382	0.713606	1.04765	0.0671628	up
A_19_P00809417	0.199545	1.15632	0.209536	up
A_19_P00809423	0.559948	1.05452	0.0765912	up
A_19_P00809455	0.149005	1.25594	0.328768	up
A_19_P00809558	0.00260829	-1.175	-0.232655	down
A_19_P00809682	0.00333079	-1.67742	-0.74624	down
A_19_P00809747	0.103644	1.01273	0.0182501	up
A_19_P00809886	0.0104647	-1.51559	-0.59988	down
A_19_P00809894	0.730962	1.08265	0.114566	up
A_19_P00809895	0.475909	-1.22023	-0.287151	down
A_19_P00809902	0.349359	-1.04676	-0.0659283	down
A_19_P00809915	0.200246	-2.09011	-1.06358	down
A_19_P00809992	0.00404326	-1.27991	-0.356038	down
A_19_P00810009	0.00918565	-1.02219	-0.0316575	down
A_19_P00810045	0.00484894	1.24819	0.319843	up
A_19_P00810085	0.298201	-1.22974	-0.298355	down
A_19_P00810205	0.00275884	-2.6712	-1.41749	down
A_19_P00810227	0.0102855	-2.08044	-1.05689	down
A_19_P00810229	0.210859	1.72296	0.784886	up
A_19_P00810274	0.862897	-1.05989	-0.0839089	down
A_19_P00810361	0.000155043	-1.2007	-0.263879	down
A_19_P00810474	0.00268197	-1.36363	-0.447457	down
A_19_P00810491	0.000346787	-2.53604	-1.34258	down
A_19_P00810523	0.637381	-1.02006	-0.0286491	down
A_19_P00810529	0.114891	-1.26468	-0.338767	down
A_19_P00810748	2.43e-06	1.85658	0.89265	up
A_19_P00810751	0.0943737	1.44836	0.534424	up
A_19_P00810806	0.00152925	1.71098	0.774822	up
A_19_P00810894	0.249213	1.50037	0.585316	up
A_19_P00810899	0.021592	1.11463	0.156571	up
A_19_P00810982	0.129061	1.41881	0.504683	up
A_19_P00810988	0.00043835	1.67903	0.747631	up
A_19_P00811038	0.00368347	-1.72348	-0.785324	down
A_19_P00811048	0.79199	1.02704	0.0384919	up
A_19_P00811178	0.518978	1.09261	0.127773	up
A_19_P00811196	0.000314841	-1.38519	-0.470087	down
A_19_P00811216	0.357417	1.35009	0.433061	up
A_19_P00811234	0.732684	-1.02321	-0.0330996	down
A_19_P00811264	0.454303	1.0743	0.103393	up
A_19_P00811284	0.122724	-1.22267	-0.290035	down
A_19_P00811348	0.417078	-1.44775	-0.533808	down
A_19_P00811430	0.0360009	-1.72058	-0.782894	down
A_19_P00811440	0.0313975	-1.26029	-0.333752	down
A_19_P00811613	0.802964	-1.00856	-0.0123033	down
A_19_P00811706	0.0597085	-1.35439	-0.437641	down
A_19_P00811717	0.760535	1.0305	0.043348	up
A_19_P00811812	0.950258	1.0141	0.0202018	up
A_19_P00811828	0.0839013	1.01356	0.0194354	up
A_19_P00811843	0.0064586	1.32922	0.410576	up
A_19_P00811924	0.0437243	1.02225	0.0317485	up
A_19_P00811940	0.0129874	1.3378	0.419865	up
A_19_P00812033	0.00918999	-2.35671	-1.23678	down
A_19_P00812050	0.0105497	-1.61396	-0.690603	down
A_19_P00812135	0.603079	-1.1724	-0.229461	down
A_19_P00812190	0.0341215	-5.98733	-2.58191	down
A_19_P00812250	0.0165114	1.35817	0.441661	up
A_19_P00812257	0.00275687	1.43009	0.516108	up
A_19_P00812310	0.0102189	-1.4316	-0.517628	down
A_19_P00812340	7.22e-06	1.21242	0.277893	up
A_19_P00812349	0.883545	1.01005	0.0144221	up
A_19_P00812554	0.14144	1.05504	0.0773044	up
A_19_P00812582	0.00348134	-1.5181	-0.602262	down
A_19_P00812587	0.00265991	1.10233	0.140557	up
A_19_P00812627	0.858071	-1.06189	-0.086628	down
A_19_P00812701	0.000141199	-1.30439	-0.383371	down
A_19_P00812715	0.00239818	1.66439	0.734994	up
A_19_P00812723	0.00119277	1.47629	0.561972	up
A_19_P00812911	0.142552	1.0811	0.112498	up
A_19_P00812944	0.0137227	1.42118	0.507084	up
A_19_P00813077	0.144414	1.15498	0.207869	up
A_19_P00813085	0.991775	-1.00011	-0.000165646	down
A_19_P00813087	0.17965	1.21983	0.286677	up
A_19_P00813124	0.123457	-1.26037	-0.333849	down
A_19_P00813192	0.396411	-1.33565	-0.417538	down
A_19_P00813347	0.421749	-1.06996	-0.0975521	down
A_19_P00813352	0.000112266	-2.35066	-1.23306	down
A_19_P00813436	0.0517305	3.42427	1.77579	up
A_19_P00813482	0.442506	-1.06321	-0.0884245	down
A_19_P00813544	0.5298	1.46939	0.555215	up
A_19_P00813554	0.000376843	-1.28528	-0.362079	down
A_19_P00813593	0.000888146	-1.03126	-0.0444073	down
A_21_P0000001	0.00435112	5.93004	2.56804	up
A_21_P0000002	0.0441291	-3.78876	-1.92173	down
A_21_P0000004	0.0191885	1.26869	0.343342	up
A_21_P0000005	0.561398	-1.11784	-0.160708	down
A_21_P0000007	0.673615	-1.03266	-0.0463682	down
A_21_P0000008	0.876081	1.00482	0.00694084	up
A_21_P0000009	0.000229584	-3.86147	-1.94915	down
A_21_P0000010	0.250815	-1.86435	-0.898671	down
A_21_P0000011	0.000370035	2.59995	1.37849	up
A_21_P0000012	0.708261	-1.15466	-0.207471	down
A_21_P0000013	0.00314824	1.30382	0.382748	up
A_21_P0000014	0.00243402	-1.27765	-0.353489	down
A_21_P0000015	0.839897	1.01713	0.0245015	up
A_21_P0000016	0.568005	-1.01189	-0.0170532	down
A_21_P0000017	0.654928	-1.10585	-0.145156	down
A_21_P0000018	0.00163642	2.78609	1.47824	up
A_21_P0000019	0.00162699	1.61508	0.691601	up
A_21_P0000020	0.605975	-1.02874	-0.0408767	down
A_21_P0000021	0.107973	-1.19234	-0.253794	down
A_21_P0000022	0.0012711	2.22284	1.1524	up
A_21_P0000023	0.131679	1.09644	0.132824	up
A_21_P0000024	0.167547	-2.27683	-1.18703	down
A_21_P0000025	0.0160922	5.87222	2.55391	up
A_21_P0000026	0.0303484	1.21492	0.280861	up
A_21_P0000028	0.0834661	-1.49432	-0.579491	down
A_21_P0000029	0.0616203	-1.25709	-0.330083	down
A_21_P0000030	0.030667	-1.2939	-0.371724	down
A_21_P0000031	0.579398	-1.21466	-0.280548	down
A_21_P0000032	0.177011	-1.50889	-0.593486	down
A_21_P0000033	0.00955615	1.37664	0.461148	up
A_21_P0000034	0.00077938	1.60529	0.68283	up
A_21_P0000035	0.000974819	1.964	0.973798	up
A_21_P0000036	3.62e-05	-2.5689	-1.36115	down
A_21_P0000037	0.121279	1.97651	0.982959	up
A_21_P0000038	0.712074	-1.17614	-0.234057	down
A_21_P0000039	0.0135285	-1.44307	-0.529145	down
A_21_P0000040	0.0279331	-1.23975	-0.310047	down
A_21_P0000041	0.0475991	1.01649	0.0236009	up
A_21_P0000042	0.00420008	2.31014	1.20798	up
A_21_P0000043	0.00324908	-1.02016	-0.028789	down
A_21_P0000044	0.0112542	-1.30064	-0.379219	down
A_21_P0000046	0.436505	1.14504	0.1954	up
A_21_P0000047	0.0278931	-1.34973	-0.43267	down
A_21_P0000048	0.412353	-1.03472	-0.0492449	down
A_21_P0000049	0.988867	1.00922	0.0132437	up
A_21_P0000050	0.0741894	-2.71422	-1.44054	down
A_21_P0000051	0.000296382	2.31357	1.21012	up
A_21_P0000052	0.059365	-1.80432	-0.851453	down
A_21_P0000053	0.00386699	-1.42763	-0.513622	down
A_21_P0000054	0.684221	-1.02901	-0.0412633	down
A_21_P0000055	0.648136	1.0132	0.0189164	up
A_21_P0000056	0.164223	1.13625	0.184281	up
A_21_P0000057	0.946285	-1.03379	-0.0479406	down
A_21_P0000059	0.116691	-1.14336	-0.193285	down
A_21_P0000060	0.00425066	-1.57811	-0.658195	down
A_21_P0000061	0.000951453	1.56173	0.643143	up
A_21_P0000062	0.00382453	2.55296	1.35217	up
A_21_P0000063	0.0057353	1.04497	0.0634633	up
A_21_P0000064	0.00359847	-1.3266	-0.407736	down
A_21_P0000065	0.00463663	-2.06867	-1.0487	down
A_21_P0000066	0.493876	1.21051	0.275609	up
A_21_P0000067	0.162662	1.94542	0.960083	up
A_21_P0000069	0.716975	1.01604	0.022953	up
A_21_P0000070	0.0787293	2.20113	1.13824	up
A_21_P0000072	0.00660046	1.04618	0.0651335	up
A_21_P0000073	0.485368	-1.08036	-0.111518	down
A_21_P0000074	0.973174	1.00798	0.0114624	up
A_21_P0000075	0.0465342	1.28318	0.359719	up
A_21_P0000076	0.000181743	-2.37188	-1.24603	down
A_21_P0000077	0.00775766	-2.12645	-1.08845	down
A_21_P0000078	0.00728648	1.02638	0.0375702	up
A_21_P0000080	0.00159622	-1.32759	-0.408808	down
A_21_P0000081	0.00134143	-1.15865	-0.212442	down
A_21_P0000082	0.0627302	1.11447	0.156356	up
A_21_P0000085	0.364022	-1.14835	-0.199561	down
A_21_P0000086	0.937977	-1.01708	-0.0244291	down
A_21_P0000087	0.229366	1.05691	0.079854	up
A_21_P0000088	0.55582	1.05747	0.0806163	up
A_21_P0000089	0.00198877	1.50419	0.588984	up
A_21_P0000090	0.402098	-1.02847	-0.0405032	down
A_21_P0000091	0.755943	1.00562	0.00808957	up
A_21_P0000092	0.0152781	-1.14832	-0.199531	down
A_21_P0000093	0.907185	1.07958	0.110475	up
A_21_P0000094	0.74502	1.04901	0.069026	up
A_21_P0000095	0.0365761	-1.3029	-0.38173	down
A_21_P0000096	0.0078111	-2.61403	-1.38627	down
A_21_P0000097	0.384089	-1.27183	-0.346908	down
A_21_P0000098	0.0493755	1.08729	0.120742	up
A_21_P0000100	0.325629	1.05203	0.0731697	up
A_21_P0000101	0.0124573	-1.12841	-0.174285	down
A_21_P0000102	0.0190263	1.15085	0.202705	up
A_21_P0000103	0.0224379	1.30561	0.38472	up
A_21_P0000104	0.493231	-1.18736	-0.247763	down
A_21_P0000105	0.680161	1.04263	0.0602258	up
A_21_P0000106	0.153451	1.032	0.0454364	up
A_21_P0000107	0.0315812	1.22755	0.295787	up
A_21_P0000108	0.790259	1.01838	0.0262779	up
A_21_P0000109	0.149954	1.11797	0.160887	up
A_21_P0000111	0.950634	-1.00131	-0.0018951	down
A_21_P0000112	0.548826	-1.02983	-0.0424094	down
A_21_P0000113	0.00829003	3.16513	1.66226	up
A_21_P0000114	0.455028	1.22425	0.291904	up
A_21_P0000115	0.515392	1.06223	0.0870976	up
A_21_P0000116	0.015181	-1.82738	-0.869779	down
A_21_P0000117	0.390352	1.10502	0.144072	up
A_21_P0000118	0.0943487	-1.42678	-0.512762	down
A_21_P0000119	0.126881	1.13455	0.182125	up
A_21_P0000120	0.48457	1.3073	0.386586	up
A_21_P0000121	0.413919	1.05503	0.077278	up
A_21_P0000123	0.221367	1.14182	0.191329	up
A_21_P0000124	0.149398	1.11192	0.15305	up
A_21_P0000126	0.658844	1.0814	0.112898	up
A_21_P0000127	0.0345821	-4.28963	-2.10085	down
A_21_P0000128	0.000636253	1.65143	0.723715	up
A_21_P0000129	0.191692	1.00962	0.0138064	up
A_21_P0000130	0.0106168	-1.67017	-0.739997	down
A_21_P0000131	0.0300462	-1.12278	-0.167072	down
A_21_P0000132	0.017161	-2.60546	-1.38154	down
A_21_P0000133	0.0205734	1.0289	0.0411016	up
A_21_P0000134	0.107711	3.04076	1.60443	up
A_21_P0000136	0.396695	-1.26927	-0.343999	down
A_21_P0000137	0.00561317	1.63512	0.7094	up
A_21_P0000138	0.0688615	-2.06182	-1.04392	down
A_21_P0000140	0.00395882	1.61149	0.688391	up
A_21_P0000141	0.00027629	-1.70956	-0.773628	down
A_21_P0000142	0.317864	-1.08957	-0.123759	down
A_21_P0000143	0.00786458	-2.06473	-1.04595	down
A_21_P0000144	0.449519	1.12929	0.175418	up
A_21_P0000145	0.00260184	-1.25738	-0.33042	down
A_21_P0000146	0.360691	1.09963	0.137024	up
A_21_P0000147	0.00406442	1.46461	0.550516	up
A_21_P0000148	0.281782	1.03567	0.0505679	up
A_21_P0000149	0.719594	-1.01752	-0.0250515	down
A_21_P0000151	0.188115	1.64569	0.718691	up
A_21_P0000152	0.0580119	1.1275	0.173126	up
A_21_P0000153	0.0162795	-1.59792	-0.676196	down
A_21_P0000154	0.228679	1.3204	0.400971	up
A_21_P0000155	0.168143	-1.16493	-0.220243	down
A_21_P0000156	0.000349114	7.93536	2.98829	up
A_21_P0000157	0.0431379	-1.03069	-0.0436037	down
A_21_P0000158	2.44e-05	1.51325	0.59765	up
A_21_P0000159	0.662829	-1.03227	-0.0458187	down
A_21_P0000160	0.0282204	2.30167	1.20268	up
A_21_P0000161	0.116775	-1.21346	-0.279126	down
A_21_P0000162	0.0472009	-1.41201	-0.497755	down
A_21_P0000163	0.00102319	1.58721	0.666489	up
A_21_P0000164	0.977946	1.00917	0.0131652	up
A_21_P0000165	0.515474	-1.33763	-0.419675	down
A_21_P0000166	0.471189	1.2441	0.315101	up
A_21_P0000167	0.488385	-1.11062	-0.151367	down
A_21_P0000168	0.011558	1.21804	0.284564	up
A_21_P0000169	0.0811971	-1.21517	-0.281161	down
A_21_P0000170	0.217925	-1.89283	-0.920547	down
A_21_P0000171	0.078705	-1.65867	-0.73003	down
A_21_P0000172	0.222129	1.33141	0.412959	up
A_21_P0000173	0.330165	-1.2425	-0.313241	down
A_21_P0000174	0.0117865	2.70361	1.43489	up
A_21_P0000176	0.251142	-1.00438	-0.00629881	down
A_21_P0000177	0.188614	1.16212	0.216756	up
A_21_P0000178	0.754308	1.01715	0.0245312	up
A_21_P0000179	0.00284162	1.22648	0.294521	up
A_21_P0000180	0.20612	-1.17666	-0.234694	down
A_21_P0000181	0.000344456	1.38048	0.465173	up
A_21_P0000182	0.463935	1.22872	0.297158	up
A_21_P0000184	0.108667	-1.10058	-0.138259	down
A_21_P0000185	0.114723	2.1431	1.0997	up
A_21_P0000186	0.0950832	-1.14969	-0.20125	down
A_21_P0000187	0.0302374	-4.27296	-2.09524	down
A_21_P0000188	0.210452	-1.08754	-0.121074	down
A_21_P0000189	0.00345958	-1.18186	-0.241063	down
A_21_P0000191	0.0255647	3.89735	1.96249	up
A_21_P0000193	0.0324756	1.32379	0.404675	up
A_21_P0000194	0.0515799	2.13466	1.09401	up
A_21_P0000195	0.000490345	-1.24053	-0.310958	down
A_21_P0000196	0.393096	-1.18855	-0.2492	down
A_21_P0000197	0.00274928	-2.90032	-1.53621	down
A_21_P0000198	0.109168	1.16184	0.216408	up
A_21_P0000199	0.130044	-2.17607	-1.12172	down
A_21_P0000200	0.00616677	1.19671	0.259072	up
A_21_P0000201	0.00594016	1.09215	0.127165	up
A_21_P0000202	0.34752	1.02792	0.039731	up
A_21_P0000204	0.000178255	4.2689	2.09386	up
A_21_P0000205	0.00019051	3.30029	1.72259	up
A_21_P0000206	0.858503	1.00942	0.0135239	up
A_21_P0000207	0.492	-1.04575	-0.064544	down
A_21_P0000208	0.0505113	-1.22613	-0.294118	down
A_21_P0000209	0.00395017	-1.46625	-0.552135	down
A_21_P0000210	0.00234528	-1.51969	-0.60378	down
A_21_P0000211	0.0120523	-1.11581	-0.15809	down
A_21_P0000212	0.00808372	-1.39085	-0.475972	down
A_21_P0000213	0.0107099	-1.43559	-0.521647	down
A_21_P0000214	0.160336	-1.98099	-0.986223	down
A_21_P0000215	0.0355058	1.23399	0.303331	up
A_21_P0000216	0.00324546	-1.57733	-0.65748	down
A_21_P0000217	0.00607062	-2.14711	-1.10239	down
A_21_P0000218	0.0638125	1.1932	0.254833	up
A_21_P0000219	0.885879	-1.00929	-0.0133385	down
A_21_P0000220	0.660297	1.02692	0.0383269	up
A_21_P0000221	0.126366	1.08198	0.113668	up
A_21_P0000222	0.551403	1.08628	0.119397	up
A_21_P0000223	0.110391	-1.17204	-0.229021	down
A_21_P0000224	0.245182	-1.42191	-0.507828	down
A_21_P0000225	0.749433	1.03265	0.0463461	up
A_21_P0000226	0.141004	-1.26397	-0.337963	down
A_21_P0000227	0.206339	-1.04329	-0.0611424	down
A_21_P0000228	0.654953	-1.02217	-0.0316286	down
A_21_P0000229	0.611366	1.02276	0.0324645	up
A_21_P0000230	0.291214	-1.1331	-0.180273	down
A_21_P0000231	0.0845943	1.01719	0.024592	up
A_21_P0000232	0.00774933	2.57778	1.36613	up
A_21_P0000233	0.511113	-1.03016	-0.0428707	down
A_21_P0000234	0.813432	-1.0167	-0.0238909	down
A_21_P0000235	0.433331	-1.07558	-0.105112	down
A_21_P0000236	0.523237	-1.05558	-0.0780299	down
A_21_P0000237	0.0469314	1.10279	0.141161	up
A_21_P0000238	0.123678	-1.19374	-0.25549	down
A_21_P0000239	0.672471	1.03287	0.0466545	up
A_21_P0000240	0.158825	1.11261	0.153951	up
A_21_P0000241	0.00174975	-1.20481	-0.26881	down
A_21_P0000242	0.115205	-1.10839	-0.148468	down
A_21_P0000243	0.21608	1.11859	0.161676	up
A_21_P0000244	0.326194	-1.09186	-0.126786	down
A_21_P0000245	0.0345794	-1.25152	-0.323684	down
A_21_P0000246	0.00525251	-1.6393	-0.713081	down
A_21_P0000247	0.0493838	-1.3411	-0.423417	down
A_21_P0000248	0.00536041	-1.62934	-0.704289	down
A_21_P0000249	0.00154044	-1.65025	-0.722681	down
A_21_P0000250	0.0085425	-1.31182	-0.391565	down
A_21_P0000251	0.995378	-1.00047	-0.000672995	down
A_21_P0000252	0.581148	1.03018	0.0428998	up
A_21_P0000253	0.00786261	-1.3071	-0.386372	down
A_21_P0000254	0.0285339	-1.37792	-0.462497	down
A_21_P0000255	0.244773	1.33779	0.419848	up
A_21_P0000256	0.000258866	-1.70064	-0.766081	down
A_21_P0000257	0.0135842	-1.53973	-0.62268	down
A_21_P0000258	0.312053	-1.10908	-0.149359	down
A_21_P0000259	0.808109	-1.04792	-0.0675299	down
A_21_P0000260	0.497224	-1.12205	-0.166132	down
A_21_P0000262	0.782968	-1.05378	-0.0755709	down
A_21_P0000263	0.11538	-1.06918	-0.0965012	down
A_21_P0000264	0.00199374	-1.32757	-0.408785	down
A_21_P0000265	0.0159862	-1.22386	-0.291439	down
A_21_P0000266	0.144885	-1.20435	-0.26825	down
A_21_P0000267	0.00160384	-1.67408	-0.743367	down
A_21_P0000268	0.399345	-1.26483	-0.338941	down
A_21_P0000269	0.00518407	-1.41941	-0.505295	down
A_21_P0000270	0.0343363	-1.17133	-0.228144	down
A_21_P0000271	0.62412	1.04938	0.0695317	up
A_21_P0000272	0.0963459	-1.62882	-0.703826	down
A_21_P0000273	0.0341426	-1.27496	-0.35045	down
A_21_P0000274	0.158427	-1.10174	-0.139785	down
A_21_P0000275	0.876592	1.01962	0.0280366	up
A_21_P0000276	0.0996299	-1.06644	-0.092805	down
A_21_P0000277	0.204405	-1.13888	-0.187611	down
A_21_P0000278	0.730092	1.01927	0.0275328	up
A_21_P0000279	0.264283	-1.28073	-0.356961	down
A_21_P0000280	0.061245	1.17351	0.230834	up
A_21_P0000281	0.316984	1.21591	0.282041	up
A_21_P0000282	0.0179172	-1.25554	-0.328307	down
A_21_P0000283	0.288718	1.10502	0.144074	up
A_21_P0000284	0.352781	-1.03714	-0.0526146	down
A_21_P0000285	0.510515	1.05124	0.0720928	up
A_21_P0000286	0.0755664	-1.34467	-0.427254	down
A_21_P0000287	0.000381672	-1.38589	-0.470809	down
A_21_P0000288	0.00377415	-1.61291	-0.689668	down
A_21_P0000289	0.0205094	-1.26517	-0.339332	down
A_21_P0000290	0.677604	-1.06071	-0.0850307	down
A_21_P0000291	0.00668374	-1.47443	-0.560156	down
A_21_P0000292	0.302385	1.44708	0.533141	up
A_21_P0000293	0.175381	1.00726	0.0104338	up
A_21_P0000294	0.0254211	-1.36392	-0.44776	down
A_21_P0000295	0.00453573	1.17832	0.236734	up
A_21_P0000296	0.0166207	-1.3994	-0.484811	down
A_21_P0000297	0.00876395	1.6335	0.707967	up
A_21_P0000298	0.00747785	1.35795	0.441433	up
A_21_P0000299	0.188774	-1.33248	-0.414109	down
A_21_P0000300	0.209512	-1.12144	-0.165351	down
A_21_P0000301	0.654648	-1.05288	-0.0743354	down
A_21_P0000302	0.0295881	-1.22552	-0.293394	down
A_21_P0000303	0.00121168	-1.64213	-0.715566	down
A_21_P0000304	0.486554	-1.06826	-0.0952655	down
A_21_P0000305	0.00140645	1.27516	0.350677	up
A_21_P0000306	0.103056	-1.6246	-0.700085	down
A_21_P0000307	0.435932	1.23561	0.305229	up
A_21_P0000308	0.18719	-1.13365	-0.180971	down
A_21_P0000309	0.619358	1.04204	0.0594147	up
A_21_P0000310	0.82827	1.02813	0.0400269	up
A_21_P0000311	0.00934353	-1.37194	-0.45622	down
A_21_P0000312	0.0302109	-1.31425	-0.394245	down
A_21_P0000313	0.705514	1.11447	0.156356	up
A_21_P0000315	0.00148505	-1.31664	-0.396858	down
A_21_P0000316	0.833725	1.02482	0.0353645	up
A_21_P0000317	0.0227968	1.29319	0.370938	up
A_21_P0000318	0.00795477	-1.24985	-0.321756	down
A_21_P0000319	0.0743332	1.1897	0.250599	up
A_21_P0000320	0.465376	-1.31736	-0.39765	down
A_21_P0000321	0.112721	1.15127	0.203221	up
A_21_P0000322	0.562269	-1.17031	-0.22689	down
A_21_P0000324	0.00844196	-1.52528	-0.609076	down
A_21_P0000325	0.232552	1.13106	0.17768	up
A_21_P0000326	0.265448	-1.34101	-0.423324	down
A_21_P0000328	0.026999	-1.14621	-0.196875	down
A_21_P0000329	0.286125	-1.08356	-0.115779	down
A_21_P0000331	0.041279	-1.42723	-0.513214	down
A_21_P0000332	0.0529353	1.09375	0.129281	up
A_21_P0000333	0.131741	1.19459	0.256517	up
A_21_P0000334	0.826453	-1.02126	-0.0303533	down
A_21_P0000335	0.00470717	-1.52608	-0.609829	down
A_21_P0000336	0.4126	1.0932	0.128562	up
A_21_P0000337	0.0322234	-1.50836	-0.592985	down
A_21_P0000339	0.00282736	-1.46309	-0.549015	down
A_21_P0000340	0.230205	1.09179	0.12669	up
A_21_P0000341	0.0946831	-1.08461	-0.117175	down
A_21_P0000342	0.169278	-1.12137	-0.165267	down
A_21_P0000343	0.28018	1.13721	0.185501	up
A_21_P0000344	0.0219743	-1.19571	-0.257864	down
A_21_P0000345	0.0933754	1.4772	0.562863	up
A_21_P0000346	0.337114	-1.66569	-0.736118	down
A_21_P0000347	0.0259418	-1.2382	-0.308243	down
A_21_P0000348	0.626263	1.02171	0.0309838	up
A_21_P0000349	0.0042631	-1.57762	-0.657745	down
A_21_P0000350	0.00131769	-2.77839	-1.47425	down
A_21_P0000351	0.00179129	-2.40864	-1.26822	down
A_21_P0000352	0.000795475	-1.47026	-0.556075	down
A_21_P0000353	0.00298079	-1.48498	-0.570441	down
A_21_P0000354	0.00254589	-1.5269	-0.610609	down
A_21_P0000355	0.0939719	-1.58558	-0.66501	down
A_21_P0000356	0.0245488	-1.57319	-0.653697	down
A_21_P0000357	0.0208413	-1.38462	-0.469488	down
A_21_P0000358	0.0554278	-1.19161	-0.252916	down
A_21_P0000359	0.495136	-1.03852	-0.0545295	down
A_21_P0000360	0.031685	1.09629	0.132633	up
A_21_P0000361	0.013768	-3.71437	-1.89312	down
A_21_P0000362	0.0659759	-1.35277	-0.435914	down
A_21_P0000363	0.0532731	-1.20724	-0.271708	down
A_21_P0000364	0.0380907	-1.37719	-0.461727	down
A_21_P0000365	0.00475151	-1.25961	-0.332972	down
A_21_P0000366	0.0435894	-1.32774	-0.408969	down
A_21_P0000367	0.0413699	-1.09788	-0.134721	down
A_21_P0000368	0.0608937	-1.25963	-0.333005	down
A_21_P0000369	0.882287	1.0101	0.0144958	up
A_21_P0000370	0.00319967	-1.28015	-0.356312	down
A_21_P0000371	0.0055277	-1.30379	-0.382713	down
A_21_P0000372	0.00991338	-1.77426	-0.827219	down
A_21_P0000374	0.400092	-1.19044	-0.251495	down
A_21_P0000375	0.00695724	-1.50146	-0.586365	down
A_21_P0000376	0.0747262	1.13207	0.178969	up
A_21_P0000378	0.645331	1.1456	0.196102	up
A_21_P0000379	0.0537194	-1.40092	-0.486378	down
A_21_P0000380	0.364291	1.07316	0.101863	up
A_21_P0000381	0.00225437	-1.78876	-0.838956	down
A_21_P0000382	0.0875495	-1.22527	-0.293097	down
A_21_P0000383	0.0186832	-1.21065	-0.275785	down
A_21_P0000384	0.644998	1.13661	0.184737	up
A_21_P0000385	0.0408138	-1.30957	-0.389098	down
A_21_P0000386	0.00704413	1.32646	0.407583	up
A_21_P0000387	0.123035	-1.47283	-0.558587	down
A_21_P0000388	0.010387	-1.43592	-0.521971	down
A_21_P0000389	0.0484432	-1.19271	-0.254242	down
A_21_P0000390	0.413423	-1.1726	-0.229714	down
A_21_P0000391	0.3877	1.07903	0.109729	up
A_21_P0000392	0.0120956	-1.73999	-0.799082	down
A_21_P0000393	0.464501	-1.07187	-0.10013	down
A_21_P0000394	0.00604183	-1.22276	-0.290141	down
A_21_P0000395	0.911709	1.02877	0.0409262	up
A_21_P0000396	0.740451	-1.05399	-0.0758638	down
A_21_P0000397	0.00466434	-1.42881	-0.514817	down
A_21_P0000398	0.027601	1.52704	0.610735	up
A_21_P0000399	0.150208	-1.75384	-0.810513	down
A_21_P0000400	0.0927681	1.00938	0.0134663	up
A_21_P0000401	0.00946294	-2.85724	-1.51462	down
A_21_P0000402	0.191963	1.14364	0.193637	up
A_21_P0000403	0.517913	1.00806	0.0115786	up
A_21_P0000404	0.35532	1.19661	0.258951	up
A_21_P0000405	0.385333	1.15315	0.205582	up
A_21_P0000406	0.212858	1.79633	0.84505	up
A_21_P0000407	0.0115921	-1.08646	-0.119641	down
A_21_P0000408	0.0281426	2.04902	1.03493	up
A_21_P0000409	0.298508	-1.36267	-0.44644	down
A_21_P0000410	0.0374047	1.01915	0.0273734	up
A_21_P0000411	0.915051	1.05835	0.0818222	up
A_21_P0000412	0.221623	1.5822	0.661936	up
A_21_P0000413	0.0827512	1.00838	0.0120354	up
A_21_P0000414	0.454997	-1.17554	-0.233325	down
A_21_P0000415	0.152736	-1.19511	-0.257147	down
A_21_P0000416	0.126435	1.26043	0.333919	up
A_21_P0000417	0.0487204	1.02546	0.0362741	up
A_21_P0000418	0.459796	1.23259	0.301688	up
A_21_P0000419	0.0323526	-1.00849	-0.0121909	down
A_21_P0000420	0.00064441	-1.08262	-0.114532	down
A_21_P0000421	0.711001	1.01512	0.0216463	up
A_21_P0000422	0.0434593	1.01596	0.0228444	up
A_21_P0000423	0.330758	1.21509	0.281062	up
A_21_P0000425	0.340688	1.35204	0.43514	up
A_21_P0000426	0.00617391	-1.0522	-0.0734081	down
A_21_P0000427	0.354203	1.22996	0.298615	up
A_21_P0000428	0.312302	1.24799	0.319602	up
A_21_P0000429	0.0226795	-1.01149	-0.0164772	down
A_21_P0000430	0.175679	-1.16787	-0.223877	down
A_21_P0000431	0.0221179	-1.02642	-0.0376159	down
A_21_P0000432	0.4911	-1.01994	-0.0284908	down
A_21_P0000433	0.00502136	3.06206	1.6145	up
A_21_P0000434	0.147052	1.01049	0.0150617	up
A_21_P0000435	0.137219	1.96305	0.973098	up
A_21_P0000436	0.253984	1.32481	0.405785	up
A_21_P0000437	0.530553	1.00358	0.00515291	up
A_21_P0000439	0.0411007	-1.12866	-0.174608	down
A_21_P0000442	0.090989	-1.0398	-0.056313	down
A_21_P0000443	0.900069	-1.04716	-0.066488	down
A_21_P0000445	0.40014	1.22818	0.29652	up
A_21_P0000446	0.314763	1.01342	0.0192384	up
A_21_P0000447	0.0227976	1.02093	0.0298849	up
A_21_P0000448	0.351793	-1.37578	-0.46025	down
A_21_P0000449	0.297375	-1.18855	-0.249199	down
A_21_P0000450	0.378074	1.40508	0.490652	up
A_21_P0000451	0.00197541	2.86266	1.51736	up
A_21_P0000452	0.45998	-1.32004	-0.400579	down
A_21_P0000453	0.0311292	1.02428	0.034606	up
A_21_P0000454	0.438007	-1.03326	-0.0472088	down
A_21_P0000455	0.466288	-1.11548	-0.15767	down
A_21_P0000456	0.416144	-1.21873	-0.285378	down
A_21_P0000457	0.148448	-1.55014	-0.632397	down
A_21_P0000458	0.98675	1.0002	0.000286685	up
A_21_P0000459	0.0196351	-1.83682	-0.877208	down
A_21_P0000460	0.227054	-1.22022	-0.287147	down
A_21_P0000461	0.226421	1.85426	0.890843	up
A_21_P0000462	0.33722	-1.14127	-0.190635	down
A_21_P0000463	0.0609379	1.22298	0.290396	up
A_21_P0000464	0.000937041	-1.35335	-0.436536	down
A_21_P0000465	0.208187	-2.01551	-1.01115	down
A_21_P0000466	0.82219	-1.10302	-0.14146	down
A_21_P0000467	0.229347	1.37461	0.459022	up
A_21_P0000468	0.00259443	-1.65814	-0.729563	down
A_21_P0000469	0.00510522	-1.45658	-0.54259	down
A_21_P0000470	0.000422062	-1.44463	-0.530696	down
A_21_P0000471	1.98e-05	3.56697	1.8347	up
A_21_P0000472	0.000657498	-1.6148	-0.691359	down
A_21_P0000473	0.000421983	-1.31521	-0.395297	down
A_21_P0000474	0.0450893	-1.4751	-0.56081	down
A_21_P0000475	0.0177792	-1.16018	-0.21435	down
A_21_P0000476	0.0373359	-1.14788	-0.198969	down
A_21_P0000477	0.00291095	-2.16856	-1.11674	down
A_21_P0000478	0.0159604	-1.50241	-0.587275	down
A_21_P0000479	0.00101501	-1.45568	-0.541697	down
A_21_P0000480	0.421673	-1.04761	-0.067099	down
A_21_P0000482	0.547252	1.03533	0.0500885	up
A_21_P0000483	0.0953661	-1.358	-0.441483	down
A_21_P0000484	0.0696892	-1.20192	-0.265342	down
A_21_P0000485	0.0186822	-1.17035	-0.226942	down
A_21_P0000486	0.0265175	-1.47041	-0.55622	down
A_21_P0000487	0.0245526	-1.20842	-0.273125	down
A_21_P0000488	0.0120016	-1.29724	-0.375451	down
A_21_P0000489	0.141973	1.08997	0.124286	up
A_21_P0000490	0.0305607	1.48038	0.565971	up
A_21_P0000491	0.0252974	1.14203	0.191598	up
A_21_P0000492	0.00249907	1.18	0.238791	up
A_21_P0000493	0.651337	-1.06541	-0.0914089	down
A_21_P0000494	0.525709	-1.06784	-0.0946994	down
A_21_P0000495	0.00291337	-1.40657	-0.492179	down
A_21_P0000496	0.0944037	-1.44014	-0.526213	down
A_21_P0000497	0.78167	1.06226	0.087134	up
A_21_P0000498	0.0315911	-1.36762	-0.451668	down
A_21_P0000499	0.103894	-1.54767	-0.630102	down
A_21_P0000500	0.0235561	1.22243	0.289746	up
A_21_P0000501	0.561343	1.05939	0.0832393	up
A_21_P0000502	0.00548074	-1.292	-0.369608	down
A_21_P0000504	0.259181	-1.03288	-0.0466664	down
A_21_P0000506	0.132951	-1.24284	-0.313638	down
A_21_P0000507	0.00831809	1.1034	0.14195	up
A_21_P0000508	0.00291636	1.12116	0.164992	up
A_21_P0000509	0.00267011	1.20836	0.27305	up
A_21_P0000510	0.0231704	-1.28335	-0.359911	down
A_21_P0000511	0.0316103	1.10596	0.145304	up
A_21_P0000512	0.000665981	-1.52249	-0.606433	down
A_21_P0000513	0.00678456	1.29246	0.370122	up
A_21_P0000514	0.534249	1.08985	0.124135	up
A_21_P0000515	0.852658	-1.01618	-0.0231535	down
A_21_P0000516	0.0167716	1.88949	0.918	up
A_21_P0000517	0.105813	-1.72187	-0.783977	down
A_21_P0000518	0.0623497	3.37593	1.75528	up
A_21_P0000519	0.0203103	3.01982	1.59446	up
A_21_P0000520	0.315418	-1.10067	-0.138378	down
A_21_P0000521	0.499028	-1.0302	-0.0429254	down
A_21_P0000522	0.125051	-1.06034	-0.0845317	down
A_21_P0000523	0.267066	1.80814	0.854508	up
A_21_P0000524	0.1897	-1.3914	-0.476535	down
A_21_P0000525	0.811257	-1.0184	-0.0263081	down
A_21_P0000526	0.00010731	9.47762	3.24453	up
A_21_P0000527	0.978657	-1.00103	-0.00147803	down
A_21_P0000528	0.590117	-1.02687	-0.0382529	down
A_21_P0000529	0.0830927	-3.11652	-1.63993	down
A_21_P0000530	0.00886286	-1.12123	-0.165082	down
A_21_P0000531	1.05e-07	4.25747	2.09	up
A_21_P0000532	0.116837	-1.78939	-0.839467	down
A_21_P0000533	0.386256	1.00548	0.00788853	up
A_21_P0000537	0.0483394	-2.44644	-1.29069	down
A_21_P0000538	0.0152818	-1.40037	-0.485804	down
A_21_P0000539	0.0229203	-1.71636	-0.779351	down
A_21_P0000540	0.657746	1.13091	0.177483	up
A_21_P0000541	0.0227432	2.02152	1.01544	up
A_21_P0000542	0.160518	1.01519	0.0217477	up
A_21_P0000543	0.283114	1.07373	0.102626	up
A_21_P0000544	0.00189812	-1.38832	-0.473342	down
A_21_P0000545	0.780692	-1.03676	-0.0520856	down
A_21_P0000546	0.0184917	2.12174	1.08525	up
A_21_P0000547	0.99342	1.0006	0.000863414	up
A_21_P0000548	0.0345277	1.33469	0.4165	up
A_21_P0000549	0.718087	1.1196	0.16298	up
A_21_P0000550	0.11575	2.78296	1.47662	up
A_21_P0000551	0.013556	2.31326	1.20993	up
A_21_P0000553	0.40397	-1.05177	-0.0728202	down
A_21_P0000554	0.439149	-1.06954	-0.0969864	down
A_21_P0000555	0.0108098	1.02394	0.0341281	up
A_21_P0000556	0.00413582	-1.49573	-0.580854	down
A_21_P0000557	0.944386	1.01192	0.0170931	up
A_21_P0000558	0.659018	-1.08975	-0.123996	down
A_21_P0000559	0.332401	1.06227	0.0871547	up
A_21_P0000560	0.0578486	-1.35935	-0.442916	down
A_21_P0000561	0.275635	-1.11381	-0.155506	down
A_21_P0000562	0.0674967	1.52571	0.609483	up
A_21_P0000563	0.00202259	-1.729	-0.78994	down
A_21_P0000564	0.153626	-1.52438	-0.608223	down
A_21_P0000565	0.152148	1.5709	0.65159	up
A_21_P0000567	0.0601885	-1.49345	-0.578646	down
A_21_P0000568	0.0698373	-2.48594	-1.31379	down
A_21_P0000569	0.0288862	-2.26815	-1.18152	down
A_21_P0000570	0.00150047	2.53462	1.34177	up
A_21_P0000571	0.164637	-2.51842	-1.33252	down
A_21_P0000572	0.0398065	1.09636	0.132724	up
A_21_P0000573	0.430893	1.46797	0.55382	up
A_21_P0000577	0.00947944	-1.6648	-0.73535	down
A_21_P0000578	0.246451	-1.88191	-0.912197	down
A_21_P0000580	0.00334741	-1.03548	-0.0502971	down
A_21_P0000581	0.00935239	-1.45043	-0.536479	down
A_21_P0000582	0.0161102	-2.66154	-1.41226	down
A_21_P0000583	0.00196518	1.379	0.463619	up
A_21_P0000584	0.235082	-1.14958	-0.201103	down
A_21_P0000585	0.237944	1.03516	0.0498471	up
A_21_P0000586	0.000318311	2.35404	1.23514	up
A_21_P0000587	0.00230971	2.03679	1.0263	up
A_21_P0000588	0.000155095	2.01471	1.01058	up
A_21_P0000590	0.387647	-1.32087	-0.40149	down
A_21_P0000591	0.0549724	-1.15132	-0.203292	down
A_21_P0000592	0.00496858	-1.1621	-0.216735	down
A_21_P0000593	0.000865413	-1.35714	-0.440573	down
A_21_P0000594	0.253434	1.21479	0.280705	up
A_21_P0000595	0.190067	-1.05714	-0.0801649	down
A_21_P0000596	0.00787914	-2.8987	-1.5354	down
A_21_P0000597	0.0173133	-2.28802	-1.1941	down
A_21_P0000598	0.0304571	1.14089	0.190164	up
A_21_P0000599	0.0171941	-1.06708	-0.0936681	down
A_21_P0000600	0.06482	-1.2947	-0.372616	down
A_21_P0000601	0.308532	1.00687	0.00987869	up
A_21_P0000603	0.794905	-1.03539	-0.050176	down
A_21_P0000604	0.133415	1.52548	0.60926	up
A_21_P0000606	0.126226	-1.55245	-0.634548	down
A_21_P0000607	0.0159557	1.02875	0.0408918	up
A_21_P0000608	0.0242658	1.8114	0.857107	up
A_21_P0000610	0.406045	1.11796	0.160869	up
A_21_P0000611	0.0367283	-1.20014	-0.263201	down
A_21_P0000612	0.265411	-1.36766	-0.451707	down
A_21_P0000613	9.7e-05	-1.65608	-0.727775	down
A_21_P0000614	0.72413	-1.14105	-0.190368	down
A_21_P0000615	0.000893135	1.26417	0.338191	up
A_21_P0000616	0.137287	-1.31084	-0.390495	down
A_21_P0000617	0.0227889	-1.31934	-0.399821	down
A_21_P0000618	0.0394551	-1.74334	-0.801856	down
A_21_P0000619	0.384245	-1.28522	-0.362018	down
A_21_P0000620	0.15272	-1.74441	-0.80274	down
A_21_P0000621	0.0174279	1.03124	0.0443776	up
A_21_P0000622	0.3116	-1.5013	-0.586217	down
A_21_P0000624	0.617847	-1.10816	-0.148168	down
A_21_P0000625	0.331303	1.13534	0.183124	up
A_21_P0000629	0.254072	-1.05162	-0.072614	down
A_21_P0000631	0.51765	-1.58563	-0.665058	down
A_21_P0000632	0.794509	1.03424	0.0485645	up
A_21_P0000634	0.0045821	2.24734	1.16822	up
A_21_P0000635	0.00751851	1.68407	0.751952	up
A_21_P0000636	0.00508628	-1.23521	-0.304761	down
A_21_P0000637	0.00280793	1.30561	0.384721	up
A_21_P0000638	0.00293666	2.77448	1.47222	up
A_21_P0000639	0.493329	1.11447	0.156352	up
A_21_P0000640	0.238439	-1.79761	-0.846082	down
A_21_P0000641	0.0115137	-1.96646	-0.975599	down
A_21_P0000643	0.0484917	1.02771	0.0394327	up
A_21_P0000644	1.04e-05	3.01325	1.59132	up
A_21_P0000645	0.385074	1.07399	0.102976	up
A_21_P0000646	0.0144236	3.1578	1.65892	up
A_21_P0000647	0.576953	-1.16607	-0.22166	down
A_21_P0000649	0.911961	-1.02508	-0.0357311	down
A_21_P0000650	0.127447	-1.03238	-0.0459786	down
A_21_P0000651	0.0147239	-1.43897	-0.525036	down
A_21_P0000652	0.103994	-1.2789	-0.3549	down
A_21_P0000653	0.675525	1.10656	0.146085	up
A_21_P0000654	0.00138711	1.13407	0.181514	up
A_21_P0000655	0.0959848	-1.23596	-0.305631	down
A_21_P0000656	0.353464	-1.37782	-0.462391	down
A_21_P0000657	0.0323379	-1.30012	-0.378646	down
A_21_P0000659	0.0732063	-1.39941	-0.484814	down
A_21_P0000660	0.782623	1.01629	0.0233118	up
A_21_P0000661	0.0134334	-2.14333	-1.09985	down
A_21_P0000662	0.907187	-1.00982	-0.0140958	down
A_21_P0000663	0.000110182	-1.57857	-0.65862	down
A_21_P0000664	0.0725422	-1.57558	-0.655882	down
A_21_P0000665	0.263652	-1.02389	-0.0340661	down
A_21_P0000666	0.0578373	1.20936	0.274241	up
A_21_P0000667	0.113858	-1.3593	-0.442864	down
A_21_P0000668	0.367242	-1.05237	-0.0736431	down
A_21_P0000669	0.0165848	1.34062	0.422899	up
A_21_P0000671	0.0309899	-1.30515	-0.384218	down
A_21_P0000672	0.189564	-1.65005	-0.722514	down
A_21_P0000673	0.385331	-1.33924	-0.421414	down
A_21_P0000674	0.37689	-1.1827	-0.242086	down
A_21_P0000675	0.13136	-2.15457	-1.1074	down
A_21_P0000676	1.34e-05	-3.68073	-1.87999	down
A_21_P0000677	0.993008	-1.00172	-0.00247308	down
A_21_P0000679	0.297479	-1.09546	-0.13154	down
A_21_P0000681	0.0958734	-1.54974	-0.632022	down
A_21_P0000682	0.168085	-1.15088	-0.202742	down
A_21_P0000683	0.0867812	1.56574	0.646848	up
A_21_P0000684	0.611716	1.03501	0.0496479	up
A_21_P0000685	0.363192	1.73262	0.792951	up
A_21_P0000686	0.199224	1.21551	0.281565	up
A_21_P0000687	0.414049	1.18185	0.241052	up
A_21_P0000689	0.00236047	-4.11986	-2.0426	down
A_21_P0000690	0.000483808	3.52748	1.81864	up
A_21_P0000691	0.0466544	1.60644	0.683865	up
A_21_P0000692	0.726781	1.1476	0.198626	up
A_21_P0000693	0.0366576	1.019	0.0271573	up
A_21_P0000694	0.29081	-1.04113	-0.0581523	down
A_21_P0000696	0.304111	1.06308	0.0882555	up
A_21_P0000697	0.000104856	-3.63416	-1.86162	down
A_21_P0000698	0.578189	1.00372	0.00536146	up
A_21_P0000699	0.178739	1.00752	0.0108097	up
A_21_P0000701	0.43226	-1.45214	-0.538179	down
A_21_P0000702	0.097251	-1.22976	-0.298382	down
A_21_P0000703	0.0678628	-1.21025	-0.275307	down
A_21_P0000704	0.220158	1.65701	0.72858	up
A_21_P0000705	0.134367	-1.73927	-0.798481	down
A_21_P0000706	0.0555532	3.65965	1.87171	up
A_21_P0000708	0.102335	-1.23512	-0.304646	down
A_21_P0000709	0.411265	1.30253	0.381321	up
A_21_P0000710	0.0116291	6.3942	2.67676	up
A_21_P0000711	0.320887	1.19048	0.251546	up
A_21_P0000712	0.125297	-1.70572	-0.770378	down
A_21_P0000714	0.00191568	-1.29787	-0.376143	down
A_21_P0000715	0.00431696	1.41277	0.498523	up
A_21_P0000716	0.240071	1.44828	0.534344	up
A_21_P0000717	0.681703	-1.00929	-0.0133433	down
A_21_P0000719	0.00482049	1.85143	0.888644	up
A_21_P0000720	0.142267	-2.06169	-1.04382	down
A_21_P0000721	0.190629	2.17933	1.12388	up
A_21_P0000722	0.622005	-1.30176	-0.380461	down
A_21_P0000723	0.248521	1.56669	0.647717	up
A_21_P0000724	0.0136975	-2.08826	-1.0623	down
A_21_P0000725	0.971634	1.00334	0.00481692	up
A_21_P0000726	0.024403	-3.53343	-1.82107	down
A_21_P0000727	0.0297604	1.01318	0.01889	up
A_21_P0000728	0.246404	-1.00332	-0.00477666	down
A_21_P0000729	0.349908	-1.34371	-0.426227	down
A_21_P0000730	0.153184	1.31144	0.391152	up
A_21_P0000731	0.00901763	-1.06642	-0.0927702	down
A_21_P0000732	0.0259962	1.15833	0.212044	up
A_21_P0000733	0.150995	1.01659	0.0237431	up
A_21_P0000735	0.413496	1.21224	0.277672	up
A_21_P0000737	0.0914651	-1.48126	-0.566827	down
A_21_P0000738	0.517461	1.42397	0.509918	up
A_21_P0000740	0.00486929	-1.99116	-0.993612	down
A_21_P0000741	0.0483851	2.21144	1.14498	up
A_21_P0000742	0.00913404	1.29054	0.36797	up
A_21_P0000743	0.0954261	1.85346	0.89022	up
A_21_P0000745	0.0653175	1.01817	0.0259825	up
A_21_P0000746	0.453166	1.23845	0.308537	up
A_21_P0000747	0.133061	1.00849	0.0121992	up
A_21_P0000748	0.353478	1.05621	0.0788923	up
A_21_P0000749	0.903871	1.05139	0.0722914	up
A_21_P0000750	0.0408597	-1.21157	-0.276882	down
A_21_P0000751	0.669281	1.0458	0.0646008	up
A_21_P0000752	0.0223741	-3.859	-1.94823	down
A_21_P0000753	0.137965	1.2415	0.312082	up
A_21_P0000755	0.632399	-1.03464	-0.0491242	down
A_21_P0000756	0.359251	1.06665	0.0930863	up
A_21_P0000757	0.163689	-1.08585	-0.118831	down
A_21_P0000759	0.115949	1.22925	0.297774	up
A_21_P0000760	0.0565568	1.10839	0.148468	up
A_21_P0000761	0.789181	-1.11461	-0.156536	down
A_21_P0000762	0.477444	1.23647	0.306227	up
A_21_P0000763	0.0209644	-3.516	-1.81394	down
A_21_P0000764	0.556885	-1.10481	-0.143804	down
A_21_P0000765	0.113533	1.01162	0.0166698	up
A_21_P0000766	0.0395056	1.11978	0.16322	up
A_21_P0000767	0.469152	-1.95084	-0.964094	down
A_21_P0000768	0.268349	-1.00367	-0.00527903	down
A_21_P0000770	0.632235	-1.20198	-0.265408	down
A_21_P0000771	0.579831	1.08999	0.124317	up
A_21_P0000772	0.458672	-1.18315	-0.242629	down
A_21_P0000773	0.239985	-1.02576	-0.0366918	down
A_21_P0000774	0.00281942	1.75879	0.814584	up
A_21_P0000775	0.0116155	-1.55219	-0.634309	down
A_21_P0000777	0.189402	-1.36041	-0.444045	down
A_21_P0000778	0.00686628	-1.79281	-0.84222	down
A_21_P0000779	7.3e-05	-3.08848	-1.6269	down
A_21_P0000780	0.783477	-1.07868	-0.109264	down
A_21_P0000781	0.9636	-1.05542	-0.0778175	down
A_21_P0000782	0.583435	-1.10875	-0.148935	down
A_21_P0000784	0.00985446	-1.40449	-0.490046	down
A_21_P0000785	0.00037262	1.3802	0.46488	up
A_21_P0000786	0.399194	-1.05194	-0.0730512	down
A_21_P0000789	0.155926	1.94773	0.961797	up
A_21_P0000790	0.0316092	-1.88887	-0.917526	down
A_21_P0000791	0.339083	1.09583	0.132029	up
A_21_P0000792	0.179304	-1.47988	-0.56548	down
A_21_P0000793	0.17031	1.35562	0.438951	up
A_21_P0000795	0.463425	-1.44873	-0.534787	down
A_21_P0000796	0.888287	-1.00195	-0.00281325	down
A_21_P0000798	0.00674687	-3.41535	-1.77203	down
A_21_P0000799	0.0473754	1.10062	0.138311	up
A_21_P0000800	0.720457	1.01516	0.021705	up
A_21_P0000801	0.152594	1.00992	0.0142404	up
A_21_P0000803	9.26e-05	4.11265	2.04007	up
A_21_P0000804	0.146098	1.30853	0.387945	up
A_21_P0000805	0.314514	-1.11097	-0.151822	down
A_21_P0000806	0.474967	-1.07586	-0.105486	down
A_21_P0000807	0.344154	-1.37227	-0.456569	down
A_21_P0000808	0.00582188	-1.404	-0.489538	down
A_21_P0000809	0.5486	1.07636	0.10616	up
A_21_P0000810	0.433813	1.00587	0.00844755	up
A_21_P0000811	0.797568	1.00625	0.00899169	up
A_21_P0000812	0.504302	-1.05069	-0.0713342	down
A_21_P0000813	0.897589	1.02046	0.0292211	up
A_21_P0000814	0.000456856	2.65887	1.41081	up
A_21_P0000816	0.184298	1.9667	0.975778	up
A_21_P0000817	0.0501946	1.31476	0.394796	up
A_21_P0000818	0.979463	-1.00589	-0.00846617	down
A_21_P0000819	0.437357	-1.5153	-0.599605	down
A_21_P0000820	0.0648894	-1.14731	-0.198251	down
A_21_P0000822	0.000132669	2.70613	1.43623	up
A_21_P0000823	0.000800702	-1.51145	-0.595932	down
A_21_P0000824	0.137674	-1.42787	-0.513864	down
A_21_P0000825	0.0209515	-1.02834	-0.0403168	down
A_21_P0000826	0.426348	-1.2438	-0.31475	down
A_21_P0000827	0.000432219	1.70044	0.765906	up
A_21_P0000829	0.00683594	-1.3082	-0.387586	down
A_21_P0000830	0.00855707	-1.37039	-0.454585	down
A_21_P0000831	0.00193694	-1.84167	-0.881012	down
A_21_P0000832	0.380037	-1.36369	-0.447518	down
A_21_P0000833	0.0120924	2.65374	1.40803	up
A_21_P0000835	0.346606	-1.31015	-0.389737	down
A_21_P0000837	0.353894	1.45011	0.536158	up
A_21_P0000839	0.194917	1.66493	0.735464	up
A_21_P0000840	0.0523624	1.19822	0.260892	up
A_21_P0000841	0.00247764	1.0207	0.0295603	up
A_21_P0000843	0.0396245	-1.63071	-0.705499	down
A_21_P0000845	0.27175	1.11062	0.151359	up
A_21_P0000846	0.00850919	-1.68277	-0.75084	down
A_21_P0000847	0.0729326	-1.17628	-0.234228	down
A_21_P0000848	0.354062	-1.3453	-0.427928	down
A_21_P0000849	0.451572	-1.32101	-0.401639	down
A_21_P0000850	0.0655194	1.51788	0.602057	up
A_21_P0000853	0.364504	1.02242	0.0319877	up
A_21_P0000854	0.350354	-1.47599	-0.561686	down
A_21_P0000855	0.000941533	3.30998	1.72682	up
A_21_P0000856	0.802239	-1.03186	-0.0452432	down
A_21_P0000857	0.0295029	-1.25342	-0.325868	down
A_21_P0000858	0.00659726	3.3187	1.73062	up
A_21_P0000859	0.00143545	-1.89456	-0.921862	down
A_21_P0000860	0.0504648	1.43319	0.51923	up
A_21_P0000861	0.383104	1.41853	0.504402	up
A_21_P0000862	0.00638683	2.57328	1.36361	up
A_21_P0000863	0.00172498	1.02334	0.033279	up
A_21_P0000864	0.130994	-1.67113	-0.740823	down
A_21_P0000865	0.0112853	-1.33692	-0.418915	down
A_21_P0000867	0.00276059	1.37017	0.454352	up
A_21_P0000869	0.129723	-2.03852	-1.02753	down
A_21_P0000870	0.0791977	-1.17576	-0.23359	down
A_21_P0000871	0.426408	1.0106	0.0152054	up
A_21_P0000872	0.394457	-1.09138	-0.126158	down
A_21_P0000873	0.00565078	1.03467	0.0491755	up
A_21_P0000874	0.0295478	-1.34855	-0.431404	down
A_21_P0000875	0.00430948	-1.04021	-0.0568755	down
A_21_P0000876	0.00137779	-3.88771	-1.95892	down
A_21_P0000877	0.147547	-1.14983	-0.201422	down
A_21_P0000878	0.238666	-1.89278	-0.92051	down
A_21_P0000879	0.322092	-1.12914	-0.175228	down
A_21_P0000880	0.169811	-1.28574	-0.362601	down
A_21_P0000881	0.329228	1.38953	0.474595	up
A_21_P0000882	0.00161033	-1.73005	-0.790814	down
A_21_P0000883	0.185255	-1.97402	-0.981135	down
A_21_P0000884	0.0115571	-1.56602	-0.647102	down
A_21_P0000885	0.0114567	-2.31017	-1.208	down
A_21_P0000886	0.14555	1.17645	0.234438	up
A_21_P0000887	0.00306157	-3.8568	-1.9474	down
A_21_P0000890	0.390714	1.20739	0.27189	up
A_21_P0000891	0.749788	1.01762	0.0251964	up
A_21_P0000892	1.68e-05	2.04647	1.03314	up
A_21_P0000893	0.000102183	1.4152	0.501008	up
A_21_P0000894	0.651411	1.1137	0.155364	up
A_21_P0000895	0.00534737	1.65698	0.72856	up
A_21_P0000896	0.700463	-1.12293	-0.167273	down
A_21_P0000897	0.00726142	-1.57252	-0.653074	down
A_21_P0000898	0.000883492	-1.65648	-0.728124	down
A_21_P0000899	0.00221511	-1.62749	-0.702648	down
A_21_P0000900	0.135578	1.27002	0.344855	up
A_21_P0000901	0.885724	-1.08806	-0.121754	down
A_21_P0000902	0.332115	-1.19527	-0.257338	down
A_21_P0000903	0.670312	-1.02352	-0.0335438	down
A_21_P0000905	0.107349	-2.16204	-1.11239	down
A_21_P0000906	0.20471	-1.65331	-0.72536	down
A_21_P0000907	0.19447	1.44141	0.527482	up
A_21_P0000908	0.113661	1.54192	0.624728	up
A_21_P0000909	0.000237568	-2.42041	-1.27525	down
A_21_P0000910	0.0102314	-1.41117	-0.496896	down
A_21_P0000911	0.0436974	-1.97385	-0.981016	down
A_21_P0000913	0.00250977	-3.4173	-1.77286	down
A_21_P0000914	0.984961	1.00042	0.000602496	up
A_21_P0000915	0.934268	-1.05027	-0.0707587	down
A_21_P0000916	0.372245	1.12214	0.166257	up
A_21_P0000917	0.129085	-1.14758	-0.198589	down
A_21_P0000920	0.331511	1.36391	0.447749	up
A_21_P0000921	0.761421	-1.03251	-0.0461497	down
A_21_P0000922	0.305195	-1.07479	-0.104057	down
A_21_P0000923	0.181729	1.95238	0.965237	up
A_21_P0000925	0.423461	1.25717	0.330177	up
A_21_P0000926	0.0331557	1.91803	0.939622	up
A_21_P0000928	0.00187267	2.19459	1.13395	up
A_21_P0000929	0.230987	-1.80031	-0.848246	down
A_21_P0000932	0.0207288	2.35893	1.23813	up
A_21_P0000933	0.103825	1.67657	0.745516	up
A_21_P0000934	0.000623093	3.32754	1.73446	up
A_21_P0000935	0.00463815	1.68378	0.751702	up
A_21_P0000936	0.373364	-1.48129	-0.566856	down
A_21_P0000937	0.0138449	-3.46098	-1.79118	down
A_21_P0000938	0.0658545	1.01717	0.024556	up
A_21_P0000940	0.0742306	1.47605	0.561746	up
A_21_P0000941	0.0220079	1.53797	0.621024	up
A_21_P0000942	0.104769	1.54461	0.627246	up
A_21_P0000943	0.667985	1.21869	0.285333	up
A_21_P0000944	0.135763	1.22263	0.289989	up
A_21_P0000946	0.21245	-1.12695	-0.172424	down
A_21_P0000950	0.0328409	2.06127	1.04353	up
A_21_P0000952	0.392993	1.45613	0.54214	up
A_21_P0000953	0.619312	1.09525	0.131261	up
A_21_P0000954	0.671402	1.06627	0.0925738	up
A_21_P0000955	0.428174	-1.23506	-0.304581	down
A_21_P0000962	0.256263	-1.97658	-0.983006	down
A_21_P0000964	0.669801	-1.04708	-0.0663748	down
A_21_P0000965	0.10573	1.02526	0.0359875	up
A_21_P0000967	0.0465264	1.01953	0.0279082	up
A_21_P0000968	0.731501	1.2046	0.268549	up
A_21_P0000970	0.0308225	-1.02387	-0.034031	down
A_21_P0000971	0.105075	-1.26474	-0.338845	down
A_21_P0000972	0.0653882	-1.07417	-0.103225	down
A_21_P0000973	0.534828	-1.31544	-0.395549	down
A_21_P0000974	0.0695214	1.01355	0.0194222	up
A_21_P0000976	0.00279992	-1.03336	-0.0473411	down
A_21_P0000977	0.120961	1.56407	0.645307	up
A_21_P0000978	0.223516	1.45805	0.544042	up
A_21_P0000982	0.21171	1.0104	0.0149281	up
A_21_P0000983	0.305791	1.46328	0.549207	up
A_21_P0000985	0.00495174	1.02913	0.0414275	up
A_21_P0000987	0.499917	1.44168	0.527749	up
A_21_P0000988	0.131471	-1.19959	-0.262544	down
A_21_P0000989	0.0743244	-2.26284	-1.17814	down
A_21_P0000990	0.000885566	-1.6156	-0.692071	down
A_21_P0000991	0.0247334	-1.81376	-0.858985	down
A_21_P0000994	0.920454	1.04367	0.0616643	up
A_21_P0000995	0.00626204	1.0377	0.0533853	up
A_21_P0000996	0.394712	-1.16341	-0.218364	down
A_21_P0000998	0.0201726	1.05106	0.0718385	up
A_21_P0001001	0.39832	1.32007	0.40061	up
A_21_P0001002	0.00640701	-1.30645	-0.385655	down
A_21_P0001006	0.41218	-1.56134	-0.642782	down
A_21_P0001007	0.500986	1.00524	0.00753285	up
A_21_P0001008	0.00325125	1.03405	0.0483127	up
A_21_P0001009	0.00719949	-1.04298	-0.0607133	down
A_21_P0001010	0.0296207	-1.29323	-0.37098	down
A_21_P0001011	0.0271649	-2.07082	-1.0502	down
A_21_P0001014	0.154561	-1.05018	-0.0706395	down
A_21_P0001015	0.0369724	-1.37123	-0.455475	down
A_21_P0001016	0.177208	1.48803	0.573402	up
A_21_P0001017	0.970322	1.00343	0.00493852	up
A_21_P0001018	0.00217071	-1.52421	-0.608058	down
A_21_P0001019	0.0265376	1.02847	0.0404963	up
A_21_P0001020	0.00703733	2.76223	1.46583	up
A_21_P0001021	0.0161021	-1.70387	-0.768819	down
A_21_P0001022	0.300736	1.00769	0.0110585	up
A_21_P0001023	0.0270735	-1.4598	-0.545772	down
A_21_P0001024	0.317891	-1.79207	-0.841628	down
A_21_P0001026	0.113314	1.51117	0.595668	up
A_21_P0001027	0.000869078	2.58059	1.3677	up
A_21_P0001029	0.0101195	1.44161	0.527684	up
A_21_P0001032	0.375865	1.27215	0.347273	up
A_21_P0001033	0.0199761	-3.10793	-1.63596	down
A_21_P0001035	0.204153	1.07688	0.106852	up
A_21_P0001036	0.217098	1.17304	0.230255	up
A_21_P0001037	0.000603988	2.83855	1.50516	up
A_21_P0001038	0.0379935	-3.04086	-1.60448	down
A_21_P0001040	0.042186	2.82751	1.49953	up
A_21_P0001041	0.562773	-1.17852	-0.236979	down
A_21_P0001042	0.386486	1.15309	0.205502	up
A_21_P0001043	0.215926	-1.55178	-0.633925	down
A_21_P0001044	0.0298073	-2.06903	-1.04895	down
A_21_P0001045	0.0097636	1.03837	0.0543223	up
A_21_P0001047	0.367011	-1.02857	-0.0406372	down
A_21_P0001048	0.00855344	1.60152	0.679439	up
A_21_P0001049	0.546857	-1.63339	-0.707866	down
A_21_P0001050	0.872984	-1.01567	-0.0224324	down
A_21_P0001051	0.291001	1.13606	0.184039	up
A_21_P0001052	0.00302499	-2.08495	-1.06001	down
A_21_P0001053	0.0144036	-3.56487	-1.83385	down
A_21_P0001055	0.931492	1.02346	0.033458	up
A_21_P0001057	0.00407573	3.78672	1.92095	up
A_21_P0001058	0.03688	-2.2849	-1.19213	down
A_21_P0001059	0.048262	-1.77727	-0.829662	down
A_21_P0001061	0.0174529	3.05703	1.61213	up
A_21_P0001062	2.46e-05	7.69263	2.94348	up
A_21_P0001063	0.0214056	1.02073	0.0296074	up
A_21_P0001064	0.331914	-1.54638	-0.628891	down
A_21_P0001065	0.014043	2.0871	1.0615	up
A_21_P0001069	0.00552746	1.05271	0.0741144	up
A_21_P0001070	0.685579	-1.12134	-0.16522	down
A_21_P0001071	0.219568	1.00451	0.00648623	up
A_21_P0001072	0.656799	1.14354	0.193502	up
A_21_P0001074	0.514988	-1.03831	-0.0542364	down
A_21_P0001075	0.162151	-1.42682	-0.512806	down
A_21_P0001076	0.0484801	-1.86087	-0.895974	down
A_21_P0001077	0.104913	1.19712	0.259573	up
A_21_P0001079	0.000527698	-3.72061	-1.89554	down
A_21_P0001082	0.0438124	-2.10663	-1.07494	down
A_21_P0001084	0.353195	1.15016	0.201834	up
A_21_P0001085	0.148844	-1.58171	-0.661486	down
A_21_P0001087	0.449974	-1.09839	-0.135385	down
A_21_P0001088	0.00321108	1.78665	0.837256	up
A_21_P0001089	0.730051	1.18041	0.239283	up
A_21_P0001091	0.429604	1.4041	0.489649	up
A_21_P0001092	0.0125382	1.3174	0.397692	up
A_21_P0001095	0.282232	-1.93185	-0.94998	down
A_21_P0001096	0.00572902	1.41294	0.498695	up
A_21_P0001097	0.0167479	-1.75417	-0.810785	down
A_21_P0001102	0.282844	-1.71101	-0.774845	down
A_21_P0001103	0.795989	1.00671	0.00964208	up
A_21_P0001104	0.0298458	1.6914	0.758221	up
A_21_P0001105	0.0463639	1.49309	0.5783	up
A_21_P0001106	0.00361575	-1.55335	-0.635386	down
A_21_P0001107	0.0915693	-1.16069	-0.214988	down
A_21_P0001108	0.0513908	-1.086	-0.11902	down
A_21_P0001109	0.0486424	-1.10549	-0.14469	down
A_21_P0001110	0.0110432	2.63149	1.39588	up
A_21_P0001111	0.0188216	-2.98475	-1.57761	down
A_21_P0001113	0.130161	1.00986	0.0141493	up
A_21_P0001115	0.164864	-1.95282	-0.96556	down
A_21_P0001122	0.11461	-1.81908	-0.863205	down
A_21_P0001124	0.241735	1.13139	0.178096	up
A_21_P0001125	0.0427099	1.59935	0.677483	up
A_21_P0001126	0.0301224	1.40104	0.486497	up
A_21_P0001127	0.00118031	-2.25436	-1.17271	down
A_21_P0001128	0.458421	-1.17351	-0.230831	down
A_21_P0001129	0.398619	1.20529	0.269384	up
A_21_P0001132	0.00672043	2.87843	1.52528	up
A_21_P0001135	0.000464332	3.32203	1.73207	up
A_21_P0001136	0.0618626	2.43297	1.28272	up
A_21_P0001137	0.197181	1.6952	0.761452	up
A_21_P0001139	0.182142	-1.3464	-0.429112	down
A_21_P0001141	0.00288703	2.52631	1.33703	up
A_21_P0001142	0.0402501	1.16511	0.220461	up
A_21_P0001143	0.147227	-1.10272	-0.141062	down
A_21_P0001148	0.122082	1.01818	0.0259917	up
A_21_P0001152	0.00195238	-1.72566	-0.787149	down
A_21_P0001153	0.00541268	-1.42244	-0.508364	down
A_21_P0001154	0.388669	1.39193	0.477085	up
A_21_P0001156	0.491394	-1.39261	-0.477787	down
A_21_P0001157	0.477851	-1.17823	-0.236622	down
A_21_P0001159	0.550844	1.22988	0.298516	up
A_21_P0001160	0.629885	-1.10854	-0.148662	down
A_21_P0001161	0.00194767	1.90086	0.926649	up
A_21_P0001162	0.34778	-1.1635	-0.218475	down
A_21_P0001163	0.0515641	-1.96176	-0.972145	down
A_21_P0001164	0.000861714	-4.35215	-2.12173	down
A_21_P0001165	0.0578272	-1.49392	-0.579103	down
A_21_P0001166	0.266653	-1.08	-0.111037	down
A_21_P0001167	0.0734115	2.04628	1.03301	up
A_21_P0001169	0.789677	1.02995	0.0425753	up
A_21_P0001170	0.00656251	-4.52716	-2.17861	down
A_21_P0001171	0.0048544	1.38122	0.465946	up
A_21_P0001172	0.0661375	-1.04123	-0.0582889	down
A_21_P0001173	0.0324943	-2.16498	-1.11435	down
A_21_P0001174	0.940776	1.0516	0.0725905	up
A_21_P0001175	0.135038	-1.0159	-0.0227579	down
A_21_P0001176	0.000440165	-2.26036	-1.17655	down
A_21_P0001177	0.0887894	-1.31992	-0.400455	down
A_21_P0001178	0.00599686	-1.70496	-0.769735	down
A_21_P0001182	0.918961	1.02819	0.040111	up
A_21_P0001184	0.380075	-1.09274	-0.127948	down
A_21_P0001185	0.553835	-1.28993	-0.367292	down
A_21_P0001186	0.228865	1.62177	0.697571	up
A_21_P0001187	0.909691	-1.05427	-0.0762393	down
A_21_P0001188	0.00269251	2.8376	1.50467	up
A_21_P0001190	0.0186911	-2.65162	-1.40687	down
A_21_P0001193	0.000379914	-2.36067	-1.23919	down
A_21_P0001194	0.846469	1.02485	0.0354169	up
A_21_P0001196	0.00128321	-2.0526	-1.03745	down
A_21_P0001197	0.00369483	1.76009	0.815647	up
A_21_P0001199	0.0457345	1.01792	0.0256191	up
A_21_P0001200	0.430796	1.09787	0.134701	up
A_21_P0001201	0.045107	2.84742	1.50966	up
A_21_P0001202	0.403095	1.29031	0.36772	up
A_21_P0001203	0.0977303	1.0078	0.0112145	up
A_21_P0001204	0.629634	1.00859	0.0123347	up
A_21_P0001206	0.154283	1.01081	0.015512	up
A_21_P0001211	0.00227638	-1.52199	-0.605962	down
A_21_P0001213	0.0140412	2.25176	1.17105	up
A_21_P0001214	0.318567	-1.20137	-0.264684	down
A_21_P0001215	0.281852	-2.14078	-1.09814	down
A_21_P0001218	0.245632	1.019	0.0271542	up
A_21_P0001219	0.0628299	-2.51808	-1.33232	down
A_21_P0001220	0.214127	1.95717	0.968766	up
A_21_P0001225	0.302708	1.52798	0.611627	up
A_21_P0001226	0.299717	1.01584	0.0226802	up
A_21_P0001228	0.99396	1.00273	0.00393515	up
A_21_P0001229	0.410011	-1.77998	-0.831858	down
A_21_P0001231	0.768457	1.00203	0.00293187	up
A_21_P0001232	0.593482	1.36367	0.447499	up
A_21_P0001233	0.00534888	1.04932	0.0694549	up
A_21_P0001236	0.869543	1.0722	0.100574	up
A_21_P0001237	0.314588	1.23599	0.305665	up
A_21_P0001238	0.00502782	1.26996	0.344778	up
A_21_P0001241	0.727226	1.11743	0.160185	up
A_21_P0001242	0.0168291	1.01728	0.0247133	up
A_21_P0001243	0.00931022	2.06567	1.04661	up
A_21_P0001244	0.0172174	1.24345	0.314346	up
A_21_P0001245	0.0121057	1.51203	0.596483	up
A_21_P0001246	0.000220259	3.44988	1.78655	up
A_21_P0001250	0.251703	1.17662	0.234654	up
A_21_P0001252	0.576826	1.0653	0.091259	up
A_21_P0001253	0.408022	1.36666	0.450657	up
A_21_P0001254	0.447004	1.06804	0.0949603	up
A_21_P0001255	0.0258198	1.99154	0.993886	up
A_21_P0001256	0.226818	1.18153	0.24065	up
A_21_P0001257	0.736979	1.08086	0.112185	up
A_21_P0001258	0.536854	1.24802	0.31964	up
A_21_P0001259	0.0131283	2.50603	1.3254	up
A_21_P0001260	0.365283	-1.29063	-0.368072	down
A_21_P0001261	0.0520397	-2.29701	-1.19976	down
A_21_P0001262	0.37828	-1.21795	-0.28446	down
A_21_P0001263	0.692646	1.15658	0.209869	up
A_21_P0001264	0.447405	-1.06294	-0.0880664	down
A_21_P0001265	0.88504	-1.00091	-0.00130805	down
A_21_P0001266	0.725239	1.21911	0.285827	up
A_21_P0001267	0.542413	1.09248	0.127612	up
A_21_P0001269	0.0164786	2.16082	1.11158	up
A_21_P0001270	0.299903	1.75189	0.808914	up
A_21_P0001271	0.359245	1.42248	0.508408	up
A_21_P0001272	0.462216	-1.15092	-0.202783	down
A_21_P0001273	0.000656214	1.94961	0.963187	up
A_21_P0001274	0.685343	1.21703	0.283359	up
A_21_P0001275	0.324788	1.31782	0.398153	up
A_21_P0001276	0.384734	1.45744	0.543437	up
A_21_P0001277	0.386265	-1.24938	-0.321212	down
A_21_P0001278	0.0468139	-3.69934	-1.88727	down
A_21_P0001279	0.011533	-1.54964	-0.631935	down
A_21_P0001281	0.571406	-1.88867	-0.917369	down
A_21_P0001282	0.022506	1.02941	0.0418217	up
A_21_P0001283	0.102565	1.65281	0.72492	up
A_21_P0001284	0.124051	-1.40143	-0.486905	down
A_21_P0001285	0.0984083	-2.00986	-1.00709	down
A_21_P0001286	0.0425819	1.00979	0.0140495	up
A_21_P0001287	0.506027	1.14925	0.200696	up
A_21_P0001288	0.278248	-1.68659	-0.754113	down
A_21_P0001290	0.143687	-1.11444	-0.156318	down
A_21_P0001291	0.00236747	1.17698	0.235089	up
A_21_P0001292	0.285511	-1.23476	-0.304232	down
A_21_P0001293	0.0139923	1.75947	0.815142	up
A_21_P0001294	0.326084	1.07728	0.107396	up
A_21_P0001295	0.0807465	-3.18162	-1.66976	down
A_21_P0001297	0.643814	-1.17391	-0.231316	down
A_21_P0001298	0.134266	-2.4278	-1.27965	down
A_21_P0001299	0.0589313	1.69835	0.764133	up
A_21_P0001300	0.0185117	-1.57033	-0.651072	down
A_21_P0001301	0.353549	1.27957	0.355658	up
A_21_P0001302	0.858863	-1.00101	-0.00145183	down
A_21_P0001303	0.0609344	-1.68164	-0.749873	down
A_21_P0001304	0.143096	2.43743	1.28536	up
A_21_P0001305	0.162115	1.59614	0.674588	up
A_21_P0001306	0.0381858	1.53015	0.613675	up
A_21_P0001307	0.00281366	-4.54665	-2.1848	down
A_21_P0001308	0.000819338	3.20645	1.68098	up
A_21_P0001311	0.00970492	-3.78186	-1.91909	down
A_21_P0001312	0.0944085	1.03078	0.043737	up
A_21_P0001313	0.00869983	2.09305	1.06561	up
A_21_P0001314	0.146005	-1.77203	-0.825406	down
A_21_P0001316	0.386819	1.06912	0.09642	up
A_21_P0001317	0.00739596	-2.10061	-1.07081	down
A_21_P0001318	0.30683	1.13992	0.188936	up
A_21_P0001320	0.733056	-1.09044	-0.124912	down
A_21_P0001322	0.0426604	-1.53258	-0.61596	down
A_21_P0001323	0.398041	-1.37623	-0.460719	down
A_21_P0001324	0.111636	1.6579	0.729354	up
A_21_P0001325	0.250425	-1.50143	-0.586333	down
A_21_P0001326	0.0184622	-2.85151	-1.51173	down
A_21_P0001327	0.0797349	2.35303	1.23452	up
A_21_P0001328	0.24944	-1.10079	-0.138534	down
A_21_P0001331	0.292617	1.36119	0.444871	up
A_21_P0001332	0.52259	1.0703	0.0980123	up
A_21_P0001333	0.00553288	-1.0445	-0.0628115	down
A_21_P0001334	0.370331	-1.08407	-0.116462	down
A_21_P0001335	0.436226	1.00431	0.00620457	up
A_21_P0001336	0.753063	1.10121	0.139087	up
A_21_P0001337	0.00675351	1.96557	0.974946	up
A_21_P0001338	0.00616314	1.73679	0.796427	up
A_21_P0001339	0.40798	-1.26521	-0.339377	down
A_21_P0001340	0.306763	1.09555	0.131657	up
A_21_P0001341	0.299374	1.23197	0.30097	up
A_21_P0001342	0.389034	-1.54496	-0.62757	down
A_21_P0001343	0.91291	-1.04074	-0.057612	down
A_21_P0001344	0.164916	1.4982	0.583232	up
A_21_P0001345	0.0627846	-1.99918	-0.999411	down
A_21_P0001346	0.0931927	2.74167	1.45505	up
A_21_P0001347	0.48942	-1.03955	-0.0559578	down
A_21_P0001348	0.0146232	2.77644	1.47324	up
A_21_P0001349	0.118549	1.91432	0.936829	up
A_21_P0001350	0.21993	1.50026	0.585211	up
A_21_P0001351	0.27604	1.00429	0.00616974	up
A_21_P0001353	0.581681	1.07129	0.0993511	up
A_21_P0001354	0.00100472	-5.56863	-2.47732	down
A_21_P0001355	7.9e-05	-1.96115	-0.971702	down
A_21_P0001356	0.0144624	2.37532	1.24812	up
A_21_P0001357	0.00330786	3.17323	1.66595	up
A_21_P0001358	0.356043	1.29244	0.370094	up
A_21_P0001359	0.00530762	1.05172	0.0727528	up
A_21_P0001360	0.0358127	1.25829	0.331468	up
A_21_P0001361	0.957685	1.02036	0.0290727	up
A_21_P0001362	0.433166	1.21381	0.27954	up
A_21_P0001363	0.287061	1.35234	0.435463	up
A_21_P0001364	0.000194759	1.43257	0.518607	up
A_21_P0001366	0.395142	-1.29539	-0.373388	down
A_21_P0001367	0.000475131	1.9462	0.960656	up
A_21_P0001368	0.669142	1.00648	0.00932384	up
A_21_P0001369	0.70797	-1.19663	-0.258973	down
A_21_P0001370	0.170706	-1.44662	-0.532688	down
A_21_P0001371	0.00976884	-1.57285	-0.653381	down
A_21_P0001372	0.0129682	-4.03663	-2.01315	down
A_21_P0001373	0.258374	1.4504	0.536455	up
A_21_P0001374	0.0103472	-1.24048	-0.310904	down
A_21_P0001375	0.0290301	2.75201	1.46049	up
A_21_P0001376	0.316884	1.48822	0.573592	up
A_21_P0001378	0.0129979	2.00179	1.00129	up
[truncated: 56,202 more rows]
